# Supplementary material for: Engineering Pyrrolysyl-tRNA Synthetase for the Incorporation of Non-Canonical Amino Acids with Smaller Side Chains
Source: MDPI journal article supplement (doi:10.3390/ijms222011194), 2021-10-17
Supplement: s1 [file s1]

## Supporting Information

# Engineering Pyrrolysyl-tRNA Synthetase for the Incorporation of Non-Canonical Amino Acids with Smaller Side Chains

Nikolaj G. Koch<sup>1,2</sup>, Peter Goettig<sup>3</sup>, Juri Rappsilber<sup>2,4</sup> and Nediljko Budisa<sup>1,5,\*</sup>

<sup>1</sup> Institut für Chemie, Technische Universität Berlin, 10623 Berlin, Germany; nikolaj.koch@mail.tu-berlin.de <sup>2</sup> Institut für Biotechnologie-Bioanalytik, Technische Universität Berlin, 10623 Berlin, Germany.

juri.rappsilber@tu-berlin.de

<sup>3</sup> Structural Biology Group, Department of Biosciences, University of Salzburg, 5020 Salzburg, Austria; peter.goettig@plus.ac.at

<sup>4</sup> Wellcome Centre for Cell Biology, University of Edinburgh, Edinburgh EH9 3BF, United Kingdom.

<sup>5</sup> Department of Chemistry, University of Manitoba, Winnipeg, MB R3T 2N2, Canada.

\* Correspondence: nediljko.budisa@tu-berlin.de; nediljko.budisa@umanitoba.ca; Tel.: +49-30-314-28821

## Table of Contents

|                                                            |    |
|------------------------------------------------------------|----|
| 1. Supplementary Table .....                               | 2  |
| 2. Supplementary Results .....                             | 2  |
| 2.1. Previously published N-terminal PylRS mutations ..... | 2  |
| 2.2. Intact Cell Fluorescence Assays .....                 | 3  |
| 2.3. Mass Spectrometry Data .....                          | 11 |
| 2.4. DNA sequences used in this study .....                | 25 |
| References: .....                                          | 26 |

## 1. Supplementary Table

**Table S1.** Amino acids used in this study.

| No. | Name                                            | Cas No.      | Company                    |
|-----|-------------------------------------------------|--------------|----------------------------|
| 1   | S-allyl-L-cystein                               | 21593-77-1   | TCI Deutschland            |
| 2   | (S)-2-aminoheptanoic acid                       | 44902-02-5   | Fluorochem                 |
| 3   | (S)-2-aminooctanoic acid                        | 116783-26-7  | Fluorochem                 |
| 4   | (S)-2-aminohept-6-enoic acid                    | 166734-64-1  | Chempur                    |
| 5   | (S)-2-aminohexanoic acid                        | 327-57-1     | TCI Deutschland            |
| 6   | (S)-2-aminohex-5-enoic acid                     | 90989-12-1   | Fluorochem                 |
| 7   | (S)-2-aminopentanoic acid                       | 6600-40-4    | TCI Deutschland            |
| 8   | (S)-2-aminopent-4-enoic acid                    | 16338-48-0   | Fluorochem                 |
| 9   | (S)-2-amino-3-cyclopropylpropanoic acid         | 102735-53-5  | Fluorochem                 |
| 10  | (S)-2-aminobutyric acid                         | 1492-24-6    | TCI Deutschland            |
| 11  | (S)-2-aminohept-6-ynoic acid                    | 835627-45-7  | Chiralix                   |
| 12  | (S)-2-aminohex-5-ynoic acid                     | 98891-36-2   | Toronto Research Chemicals |
| 13  | (S)-2-aminopent-4-ynoic acid                    | 23235-01-0   | Fluorochem                 |
| 14  | (S)-2-amino-3-azidopropanoic acid hydrochloride | 105661-40-3  | Iris Biotech               |
| 15  | (S)-2-amino-4-azidobutanoic acid hydrochloride  | 942518-29-8  | Carl Roth                  |
| 16  | (S)-2-amino-5-azidopentanoic acid hydrochloride | 1782935-10-7 | Iris Biotech               |
| 17  | (S)-2-amino-6-azidohexanoic acid hydrochloride  | 159610-92-1  | Fluorochem                 |
| 18  | (S)-2-amino-3-cyanopropanoic acid               | 6232-19-5    | Iris Biotech               |
| 19  | (S)-2-amino-4-cyanobutanoic acid                | 6232-22-0    | Iris Biotech               |
| 20  | (S)-2-amino-5,5'-azi-hexanoic acid              | 851960-68-4  | Thermo Fisher Scientific   |
| 21  | (S)-2-amino-4-methylpent-4-enoic acid           | 87392-13-0   | Fluorochem                 |
| 22  | L-methionine                                    | 63-68-3      | Carl Roth                  |
| 23  | L-methionine sulfoxide                          | 3226-65-1    | Sigma-Aldrich (Merck)      |
| 24  | L-methionine sulfone                            | 7314-32-1    | Iris biotech               |
| 25  | L-ethionine                                     | 13073-35-3   | Sigma-Aldrich (Merck)      |
| 26  | S-tert-butyl- L-cystein                         | 2481-09-6    | Fluorochem                 |
| 27  | S-propargyl- L-cystein                          | 3262-64-4    | Fluorochem                 |
| 28  | S-benzyl- L-cystein                             | 3054-01-1    | Fluorochem                 |

## 2. Supplementary Results

### 2.1. Previously published N-terminal PylRS mutations

In an earlier study, seven N-terminal mutations were shown to increase the ribosomal Nεcrotonyl-lysine incorporation efficiency of an OTS based on an engineered MbPylRS enzyme [62].

It was claimed that these mutations could generally increase ncAA incorporation efficiencies for PylRSbased systems, as they do not alter the aaRS substrate specificity towards ncAAs. Herein, four of these mutations were tested. Transferred to the OTS for ribosomal Sac incorporation, mutations T13I and I36V resulted in a modest enhancement of reporter production in comparison to *MbSacRS* lacking these mutations (**Figure S1**). Based on these results, the two mutations were incorporated by default in all *MbSacRS* constructs. All tested PylRS variants carry the Y384F mutation by default (see main text).

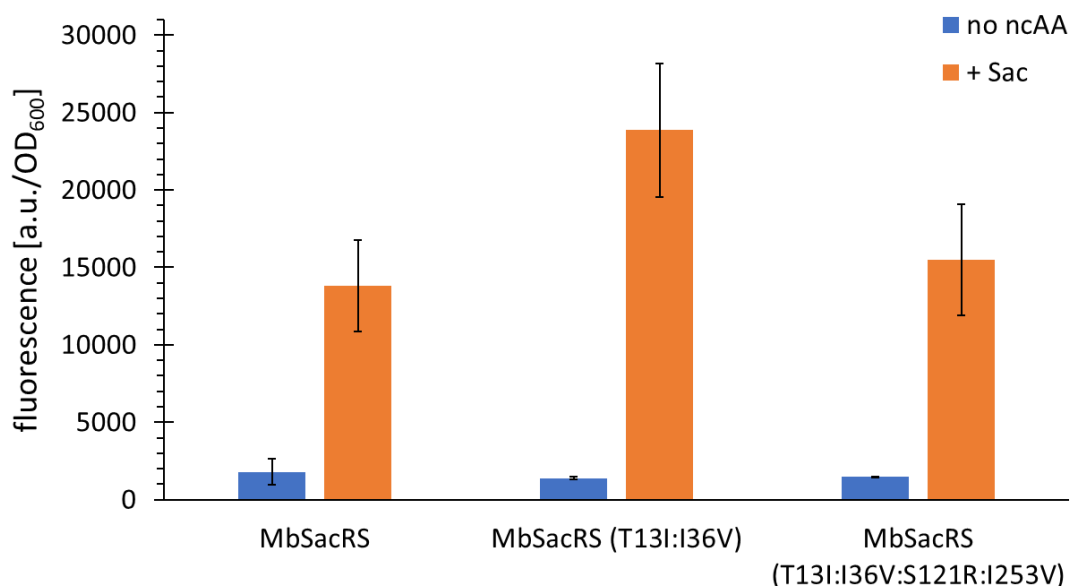

**Supplementary Figure S1:** OTS efficiency comparison of three different *MbSacRS* constructs. Ribosomal incorporation of Sac (1 mM) and controls without ncAA (- Sac) supplementation. Intact cell fluorescence of *E. coli* BL21(DE3), with endpoint measurements after 24 h of incubation. Relative fluorescence is normalized to the highest value. The data (incl. standard deviation) represent the mean of three biological replicates.

## 2.2. Intact Cell Fluorescence Assays

Note that all following *MbPyl* constructs are N-terminally fused to the C-terminus of SmbP. For clarity SmbP is omitted in the notation.

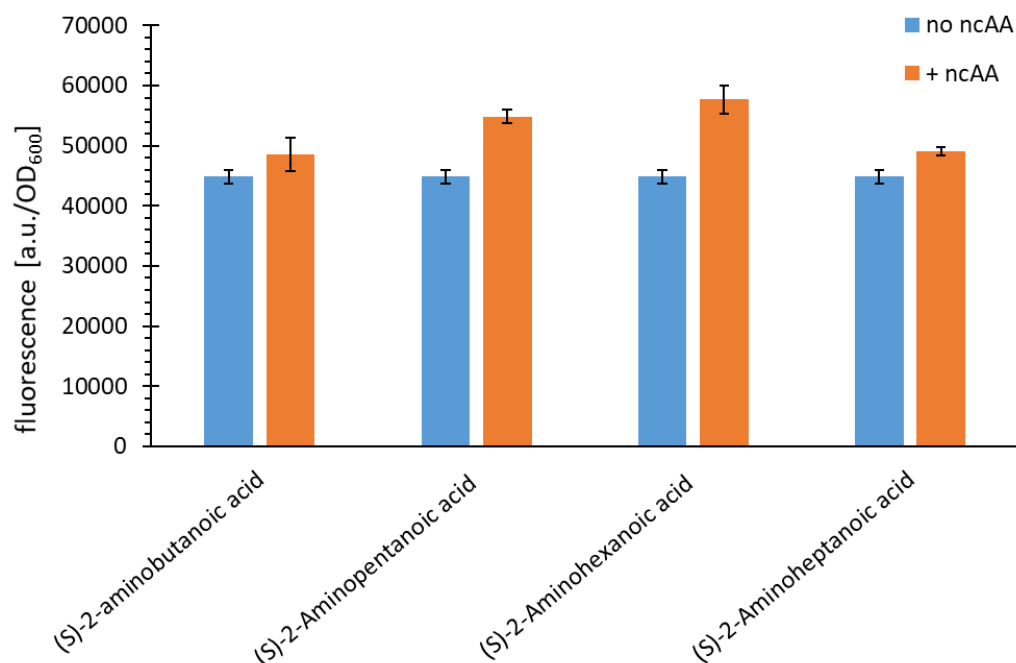

**Supplementary Figure S2:** Comparison of ribosomal incorporation efficiency of MbSacRS with four different ncAAs (2, 3, 5, 7, 10) (10 mM) and controls without ncAA supplementation. Intact cell fluorescence of *E. coli* BL21(DE3), endpoint measurements after 24 h of incubation. The data (incl. standard deviation) represent the mean of three biological replicates.

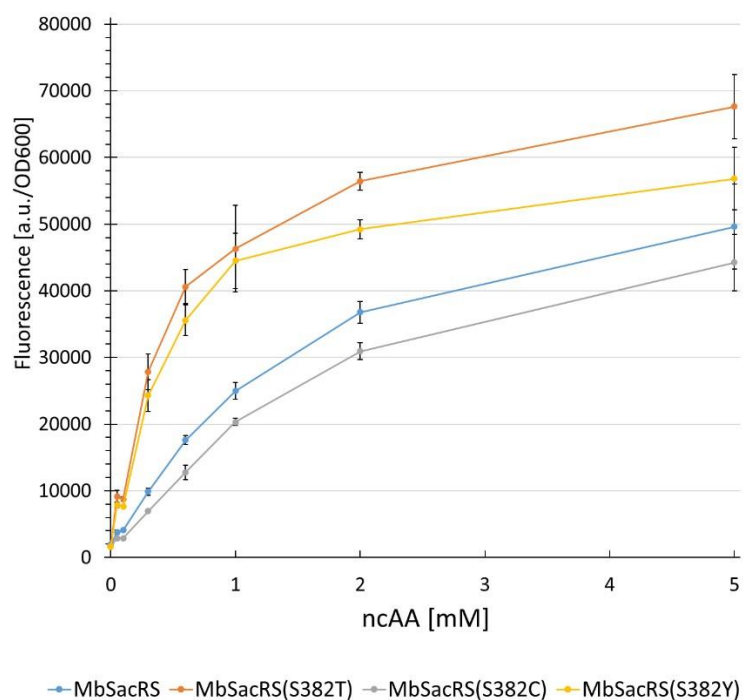

**Supplementary Figure S3:** Concentration dependent protein production for MbPylRS variants. The measured fluorescence intensity is displayed for intact *E. coli* BL21(DE3) cells expressing the sfGFP(R2 amber) reporter, with endpoint measurements after 24 h. Endpoint measurements comprise different ncAA concentrations (0.05, 0.1, 0.3, 0.6, 1, 2, and 5 mM) of *S*-allyl-L-cysteine (Sac, 1). The data (incl. standard deviation) represent the mean of three biological replicates.

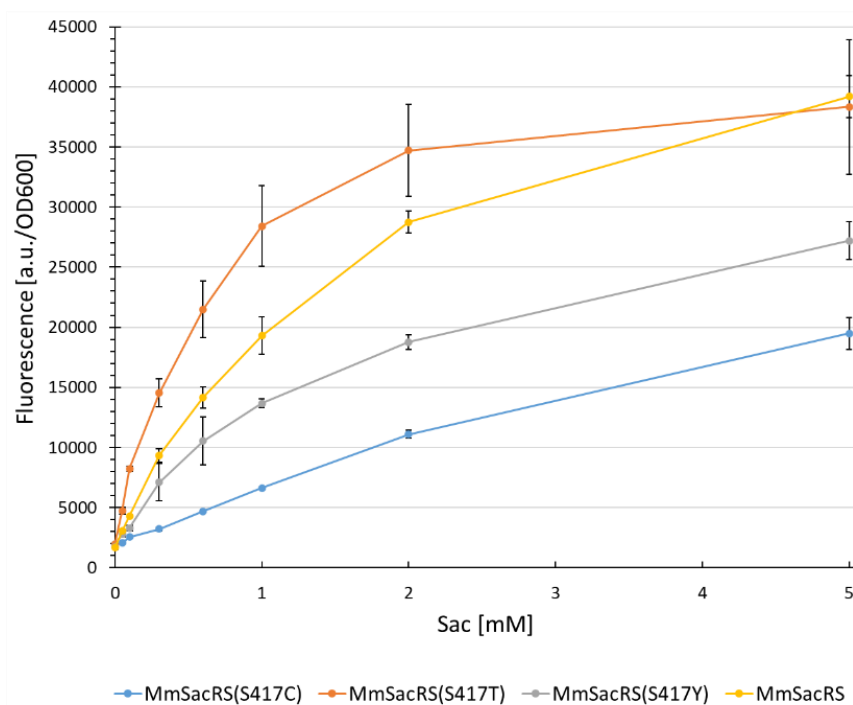

**Supplementary Figure S4:** Concentration dependent protein production for *MmPylRS* variants. Measured fluorescence intensity of intact *E. coli* BL21(DE3) cells expressing the sfGFP(R2 amber) reporter, with endpoint measurements after 24 h. The endpoint measurements comprise different ncAA concentrations (0.05, 0.1, 0.3, 0.6, 1, 2, and 5 mM) of *S*-allyl-L-cysteine (Sac, **1**). The data (incl. standard deviation) represent the mean of three biological replicates.

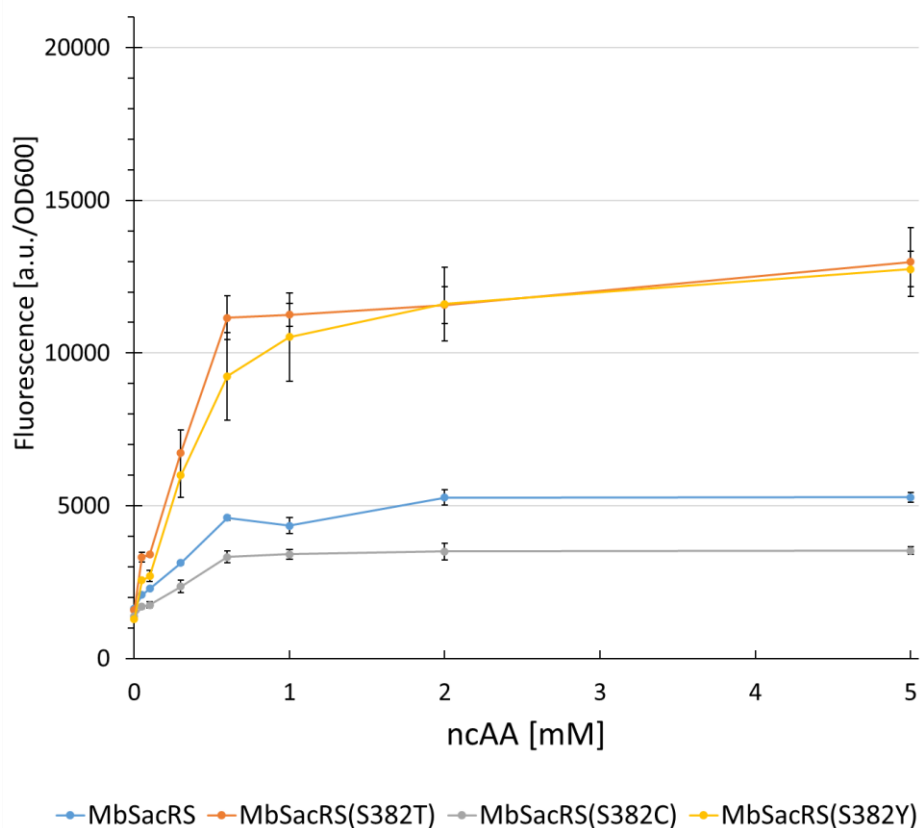

**Supplementary Figure S5:** Concentration dependent protein production for *MbPylRS* variants. Measured fluorescence intensity of intact *E. coli* BL21(DE3) cells expressing the sfGFP(R2 amber)

reporter, with endpoint measurements after 24 h. Endpoint measurements comprise different ncAA concentrations (0.05, 0.1, 0.3, 0.6, 1, 2, and 5 mM) of *S*-propargyl-L-cysteine (27). The data (incl. standard deviation) represent the mean of three biological replicates.

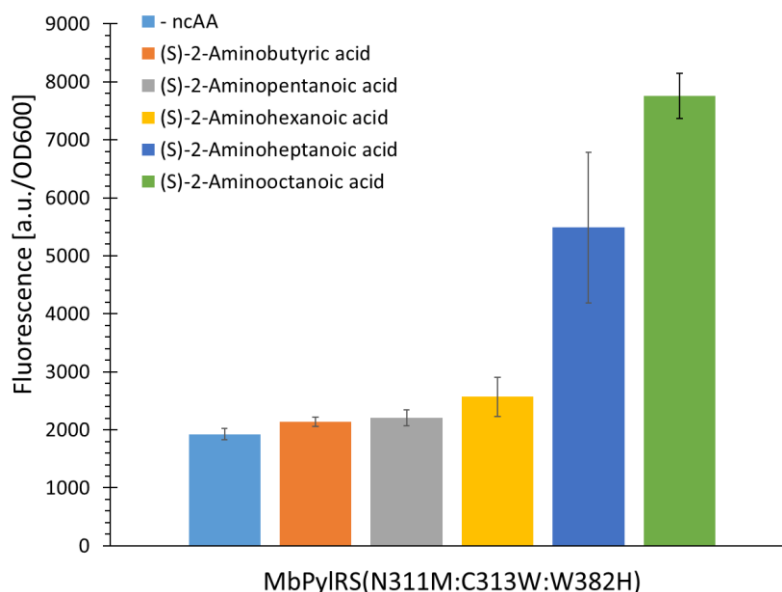

**Supplementary Figure S6:** Comparison of aliphatic ncAA (2, 3, 5, 7, 10) incorporation efficiency for MbPyIRS(N311M:C313W:W382H). Fluorescence measurements of intact *E. coli* BL21(DE3) cells producing the SUMO-sfGFP(R2amber) reporter protein. Intact cell fluorescence of *E. coli* BL21(DE3), with endpoint measurements after 24 h of incubation. The data (incl. standard deviation) represent the mean of three biological replicates.

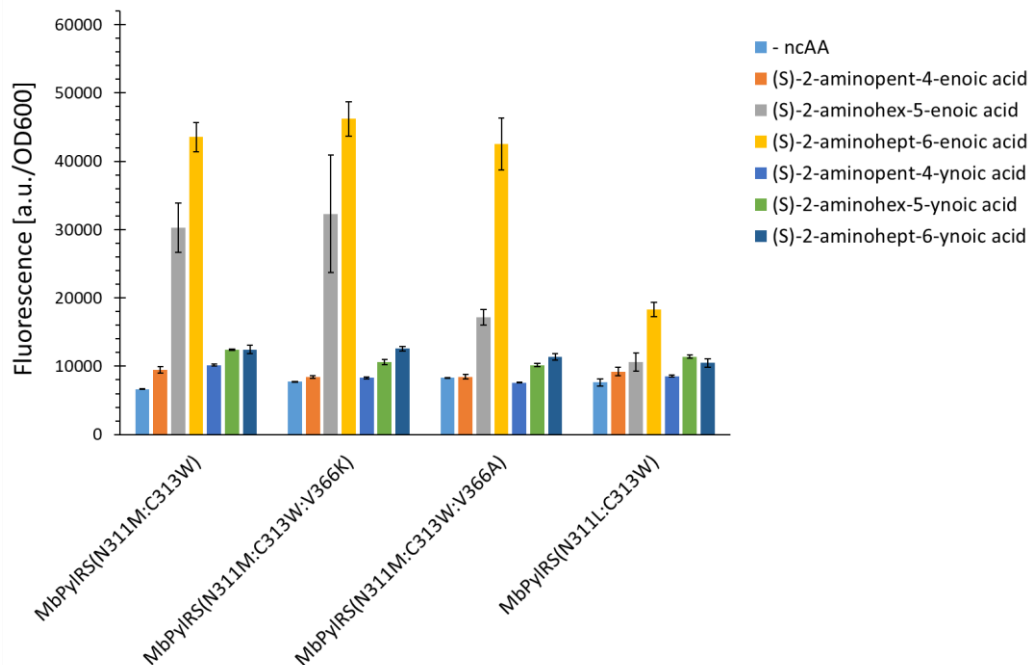

**Supplementary Figure S7:** Comparison of aliphatic ncAA (4, 6, 8, 11, 12, 13) incorporation efficiency for MbPyIRS variants. Fluorescence measurements of intact *E. coli* BL21(DE3) cells producing the SUMO-sfGFP(R2amber) reporter protein. Intact cell fluorescence of *E. coli* BL21(DE3), with endpoint measurements after 24 h of incubation. The data (incl. standard deviation) represent the mean of three biological replicates.

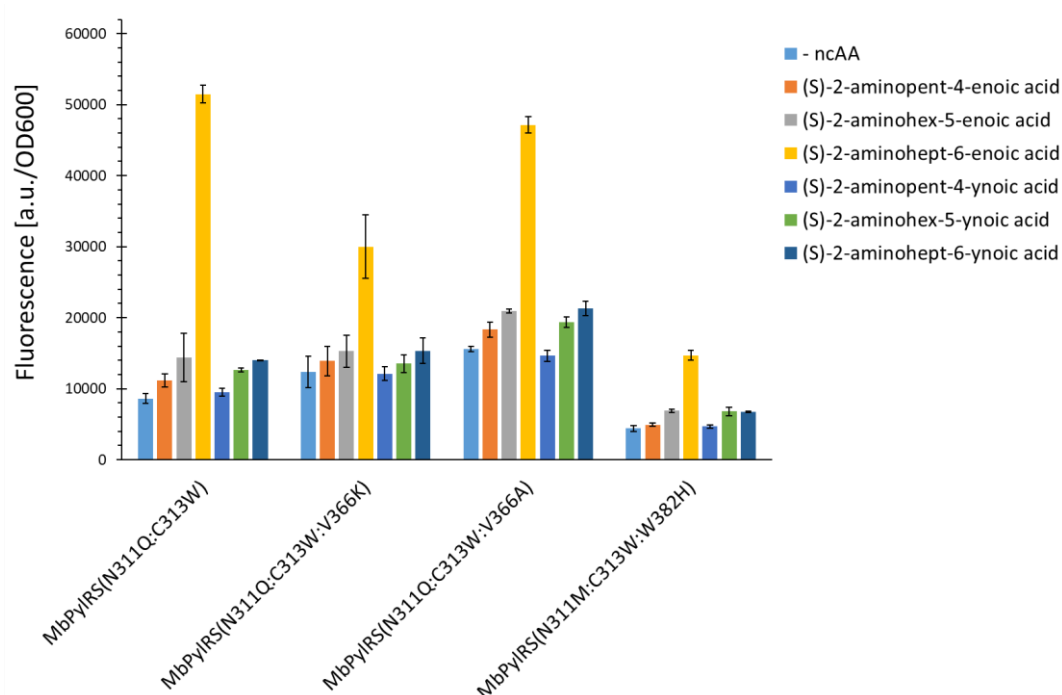

**Supplementary Figure S8:** Comparison of aliphatic ncAA (4, 6, 8, 11, 12, 13) incorporation efficiency for MbPylRS variants. Fluorescence measurements of intact *E. coli* BL21(DE3) cells producing the SUMO-sfGFP(R2amber) reporter protein. Intact cell fluorescence of *E. coli* BL21(DE3), with endpoint measurements after 24 h of incubation. The data (incl. standard deviation) represent the mean of three biological replicates.

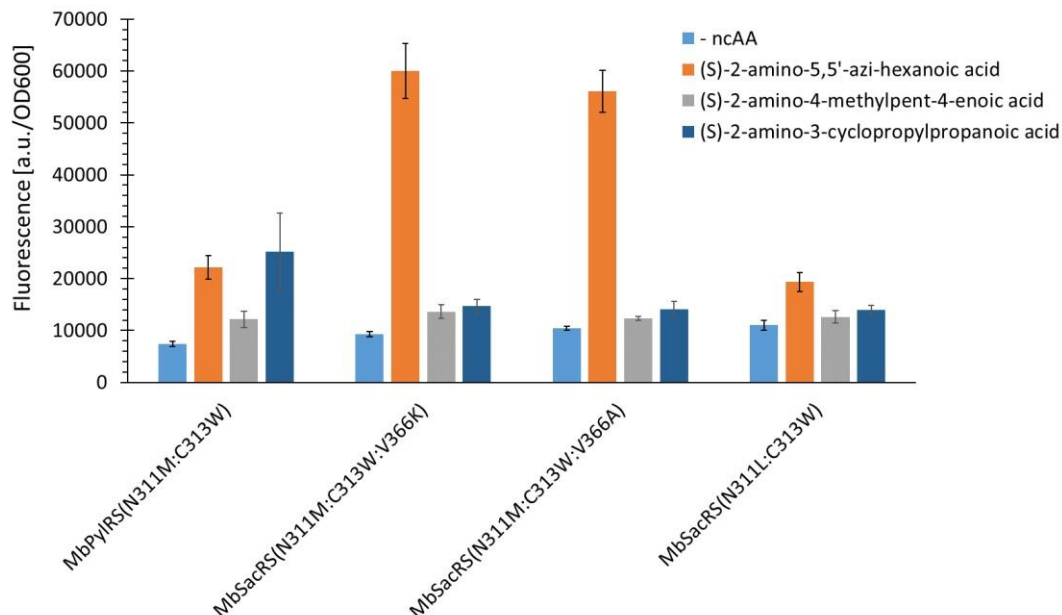

**Supplementary Figure S9:** Comparison of (S)-2-amino-5,5'-azi-hexanoic acid (20), (S)-2-amino-4-methylpent-4-enoic acid (21) and (S)-2-amino-3-cyclopropylpropanoic acid (9) incorporation efficiency for MbPylRS variants. Fluorescence measurements of intact *E. coli* BL21(DE3) cells producing the SUMO-sfGFP(R2amber) reporter protein. Intact cell fluorescence of *E. coli* BL21(DE3), with endpoint measurements after 24 h of incubation. The data (incl. standard deviation) represent the mean of three biological replicates.

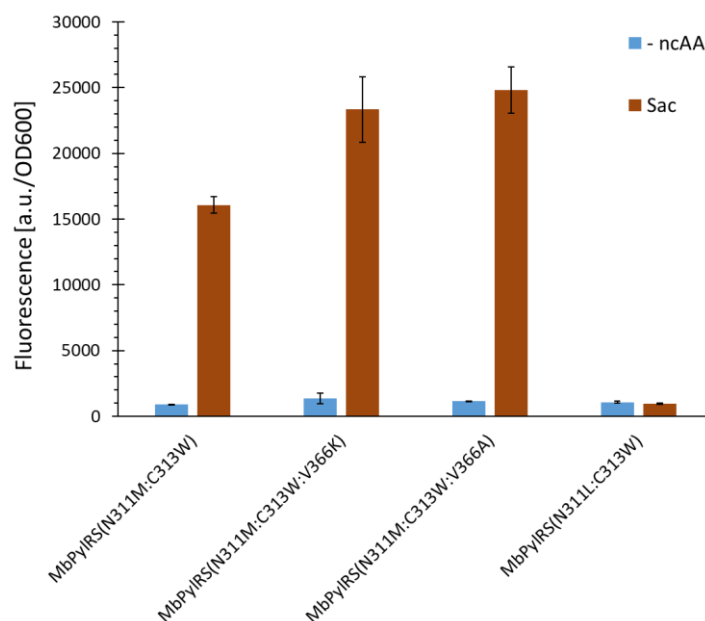

**Supplementary Figure S10:** Comparison of *S*-allyl-L-cysteine (Sac, **1**) incorporation efficiency for MbPyIRS(N311M:C313W) variants mutate at position V366. Fluorescence measurements of intact *E. coli* BL21(DE3) cells producing the SUMO-sfGFP(R2amber) reporter protein. Relative fluorescence is normalized to the highest value. Intact cell fluorescence of *E. coli* BL21(DE3), with endpoint measurements after 24 h of incubation. The data (incl. standard deviation) represent the mean of three biological replicates.

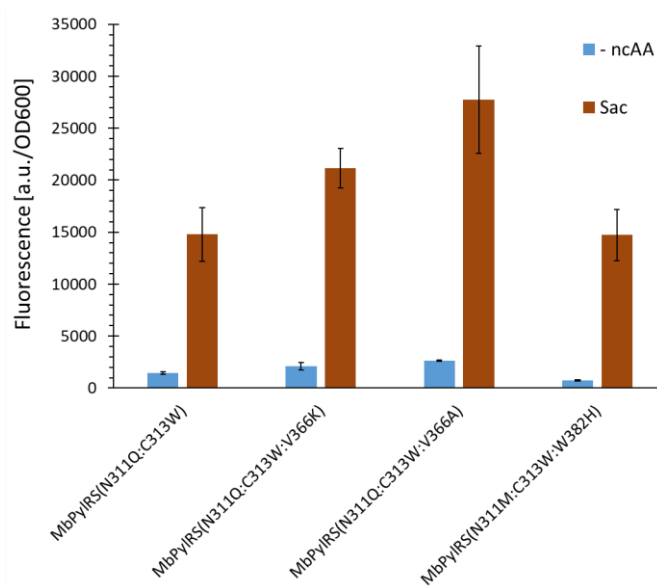

**Supplementary Figure S11:** Comparison of *S*-allyl-L-cysteine (Sac, **1**) incorporation efficiency for MbPyIRS(N311Q:C313W) variants mutate at position V366. Fluorescence measurements of intact *E. coli* BL21(DE3) cells producing the SUMO-sfGFP(R2amber) reporter protein. Relative fluorescence is normalized to the highest value. Intact cell fluorescence of *E. coli* BL21(DE3), with endpoint measurements after 24 h of incubation. The data (incl. standard deviation) represent the mean of three biological replicates.



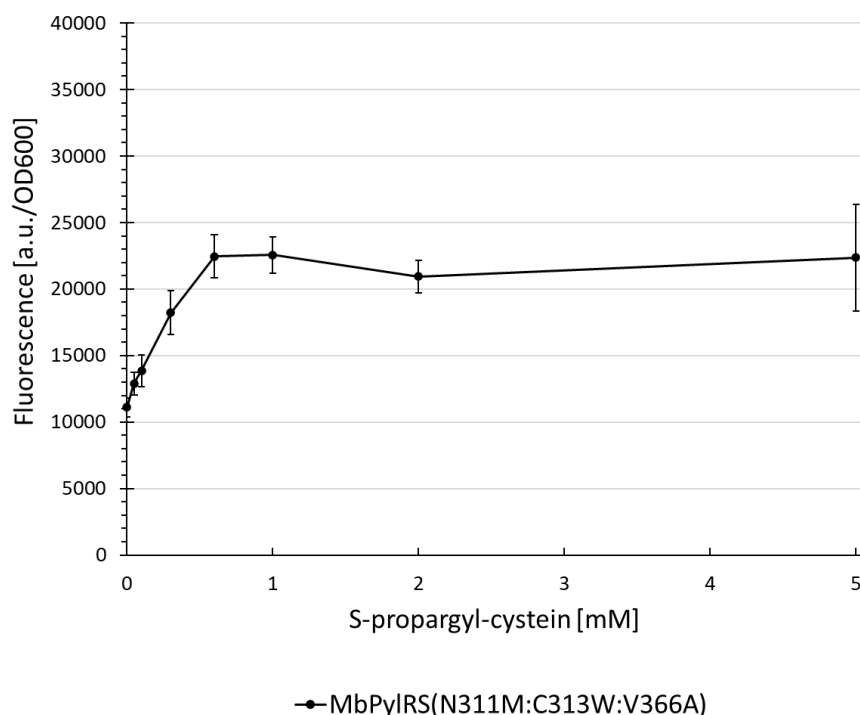

**Supplementary Figure S12:** Concentration dependent protein production for MbPyIRS(N311M:C313W:V366A). Measured fluorescence intensity of intact *E. coli* BL21(DE3) cells expressing the sfGFP(R2 amber) reporter, with endpoint measurements after 24 h. Endpoint measurements comprise different ncAA concentrations (0.05, 0.1, 0.3, 0.6, 1, 2, and 5 mM) of Spropargyl-L-cysteine (27). The data (incl. standard deviation) represent the mean of three biological replicates.

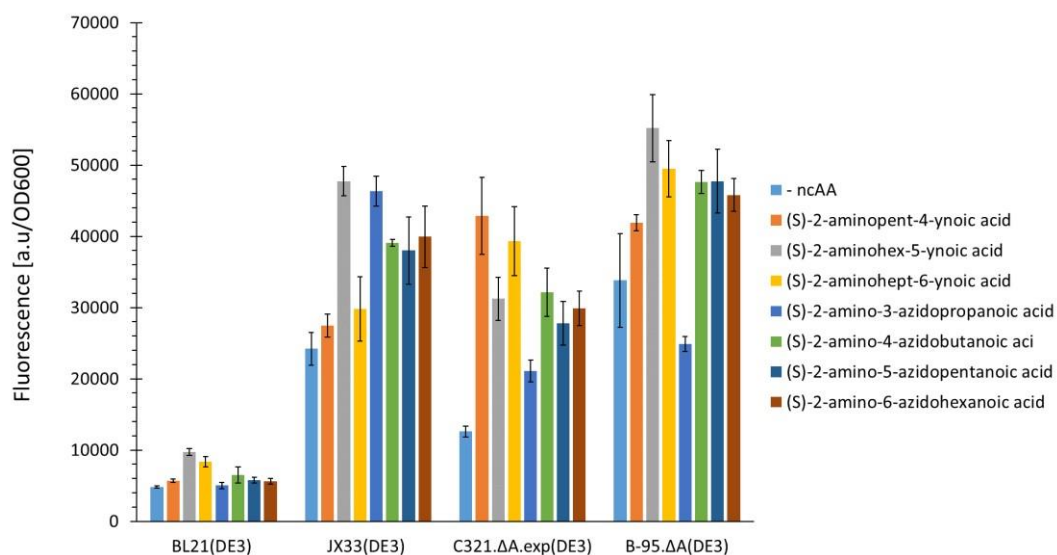

**Supplementary Figure S13:** Comparison of ncAA (11, 12, 13, 14, 15, 16, 17) incorporation efficiency for MbPyIRS(N311M:C313W) in different *E. coli* host strains. Fluorescence measurements of intact *E. coli* BL21(DE3) cells producing the SUMO-sfGFP(R2amber) reporter protein. Intact cell fluorescence of *E. coli* BL21(DE3), endpoint measurements after 24 h of incubation. The data (incl. standard deviation) represent the mean of three biological replicates.

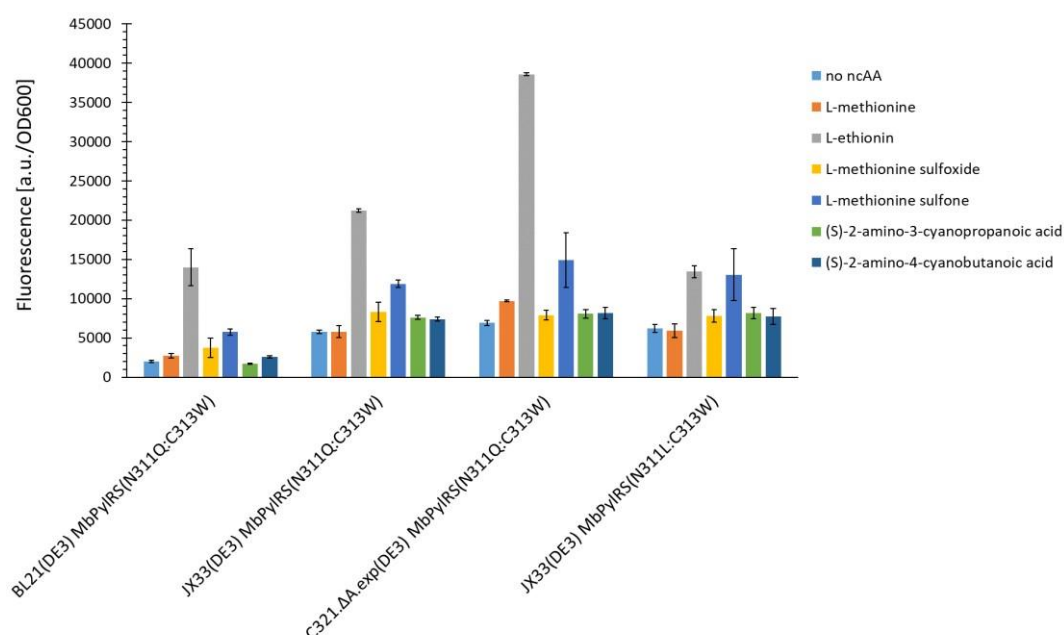

**Supplementary Figure S14:** Comparison of ncAA (18, 19, 22, 23, 24, 25) incorporation efficiency for MbPylRS constructs in different *E. coli* host strains. Fluorescence measurements of intact *E. coli* BL21(DE3) cells producing the SUMO-sfGFP(R2amber) reporter protein. Intact cell fluorescence of *E. coli* BL21(DE3), endpoint measurements after 24 h of incubation. The data (incl. standard deviation) represent the mean of three biological replicates.

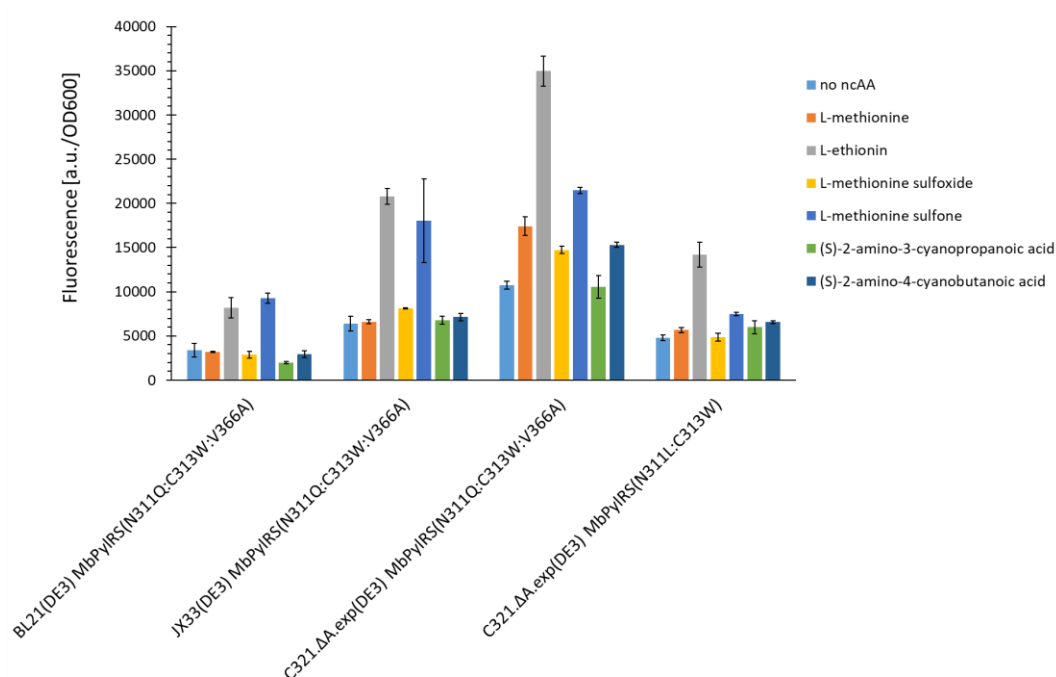

**Supplementary Figure S15:** Comparison of ncAA (18, 19, 22, 23, 24, 25) incorporation efficiency for MbPylRS constructs in different *E. coli* host strains. Fluorescence measurements of intact *E. coli* BL21(DE3) cells producing the SUMO-sfGFP(R2amber) reporter protein. Intact cell fluorescence of *E. coli* BL21(DE3), with endpoint measurements after 24 h of incubation. The data (incl. standard deviation) represent the mean of three biological replicates.

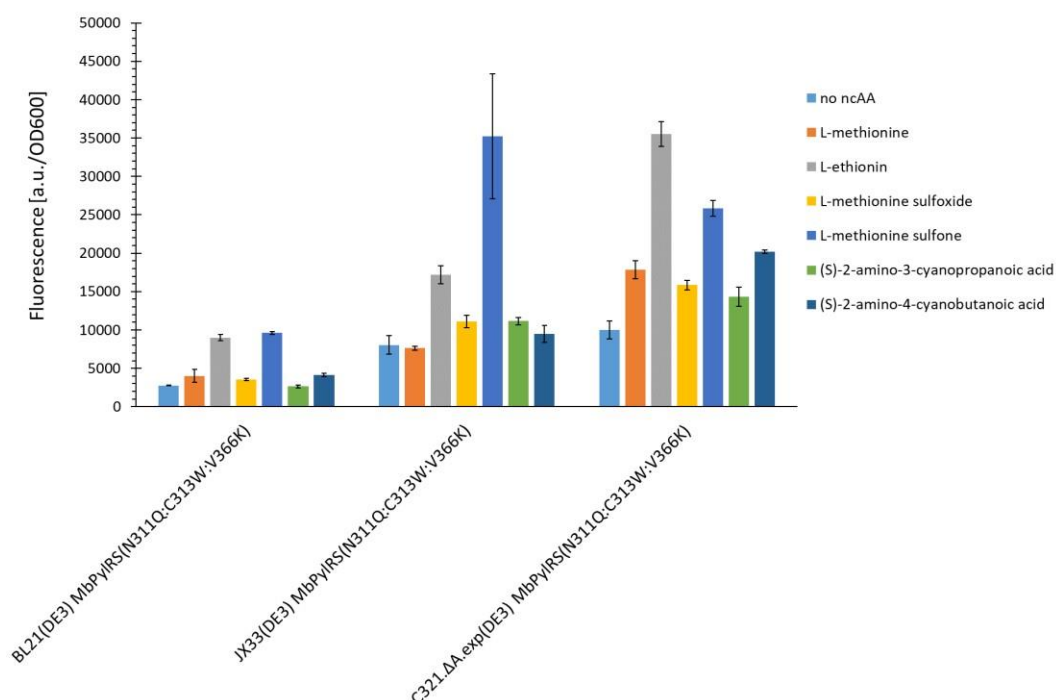

**Supplementary Figure S16:** Comparison of ncAA (18, 19, 22, 23, 24, 25) incorporation efficiency for *MbPylRS* constructs in different *E. coli* host strains. Fluorescence measurements of intact *E. coli* BL21(DE3) cells producing the SUMO-sfGFP(R2amber) reporter protein. Intact cell fluorescence of *E. coli* BL21(DE3), with endpoint measurements after 24 h of incubation. The data (incl. standard deviation) represent the mean of three biological replicates.

### 2.3. Mass Spectrometry Data

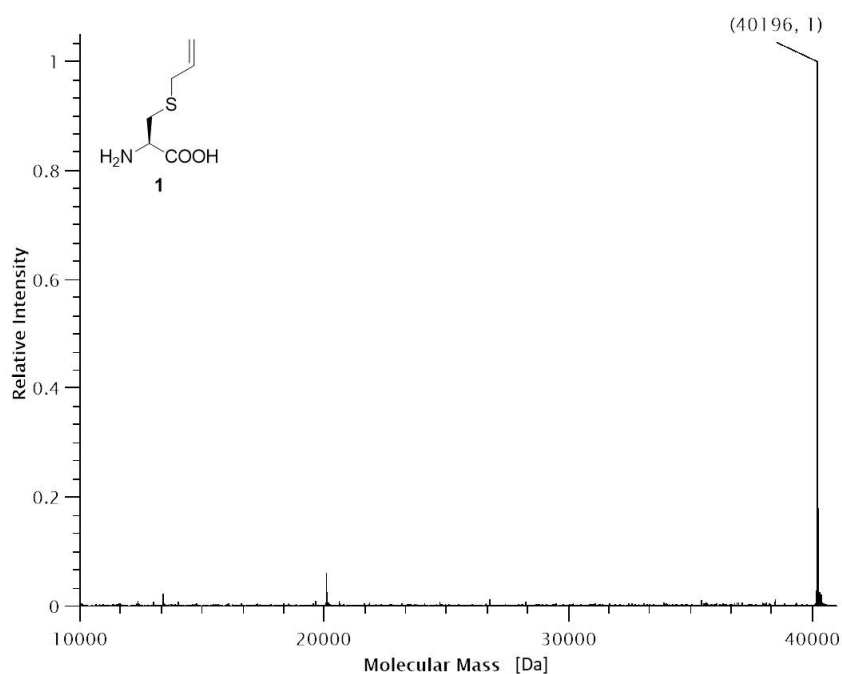

**Supplementary Figure S17:** Deconvoluted ESI-MS spectrum of His<sub>6</sub>-SUMO-sfGFP(R2(ncAA))-Strep production in *E. coli* BL21(DE3) with co-expression of SmbP-MbSacRS(N311M:C313W:V366A). Expected protein mass: 40194.9 Da. Observed mass: 40196 Da.

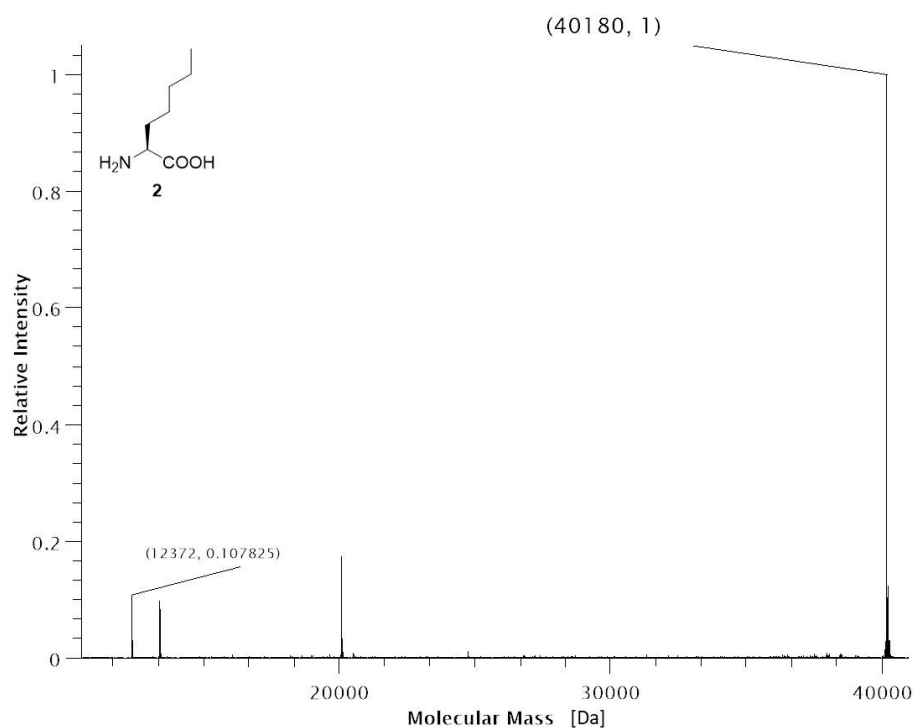

**Supplementary Figure S18:** Deconvoluted ESI-MS spectrum of His<sub>6</sub>-SUMO-sfGFP(R2(ncAA))-Strep production in *E. coli* BL21(DE3) with co-expression of SmbP-MbSacRS(N311Q:C313W). Expected protein mass: 40178.8 Da. Observed mass: 40180 Da. Expected mass of His<sub>6</sub>-SUMO truncation product: 12372.8 Da. Observed mass: 12372 Da.

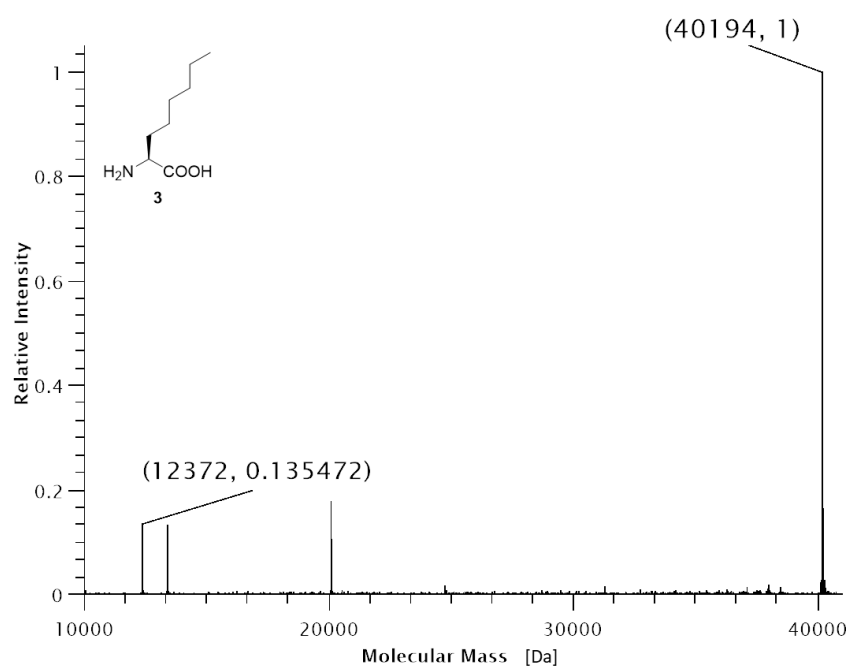

**Supplementary Figure S19:** Deconvoluted ESI-MS spectrum of His<sub>6</sub>-SUMO-sfGFP(R2(ncAA))-Strep production in *E. coli* BL21(DE3) with co-expression of SmbP-MbSacRS(N311M:C313W:V366A). Expected protein mass: 40192.9 Da. Observed mass: 40194 Da. Expected mass of His<sub>6</sub>-SUMO truncation product: 12372.8 Da. Observed mass: 12372 Da.

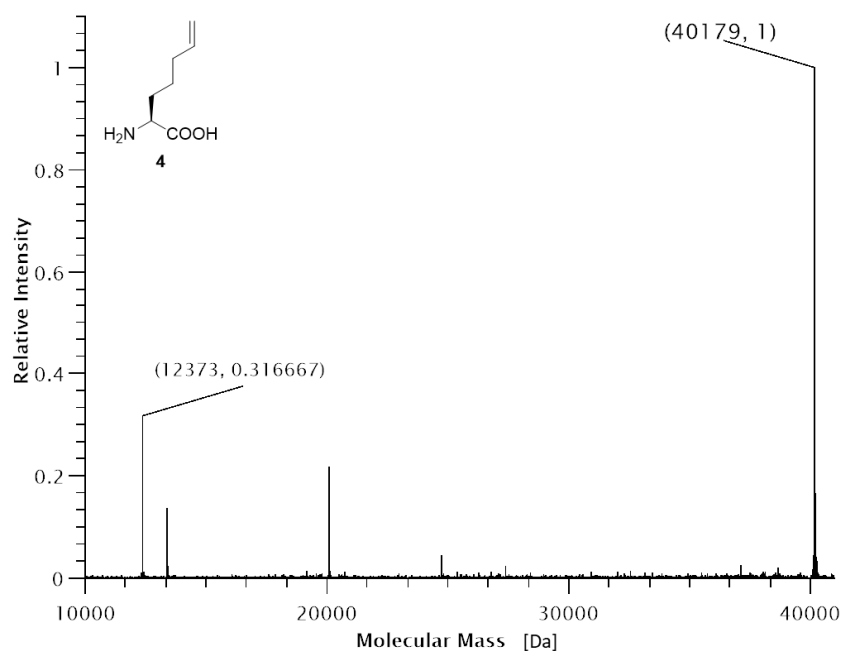

**Supplementary Figure S20:** Deconvoluted ESI-MS spectrum of His<sub>6</sub>-SUMO-sfGFP(R2(ncAA))-Strep production in *E. coli* BL21(DE3) with co-expression of SmbP-MbSacRS(N311M:C313W:V366A). Expected protein mass: 40176.8 Da. Observed mass: 40179 Da. Expected mass of His<sub>6</sub>-SUMO truncation product: 12372.8 Da. Observed mass: 12373 Da.

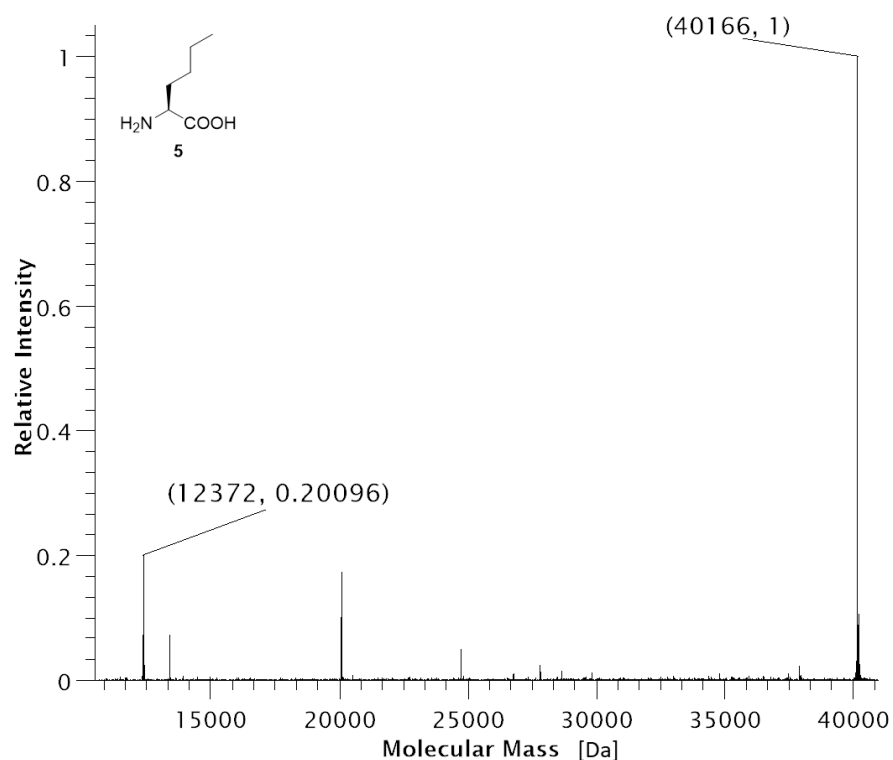

**Supplementary Figure S21:** Deconvoluted ESI-MS spectrum of His<sub>6</sub>-SUMO-sfGFP(R2(ncAA))-Strep production in *E. coli* BL21(DE3) with co-expression of SmbP-MbSacRS(N311M:C313W). Expected protein mass: 40164.8 Da. Observed mass: 40166 Da. Expected mass of His<sub>6</sub>-SUMO truncation product: 12372.8 Da. Observed mass: 12372 Da.

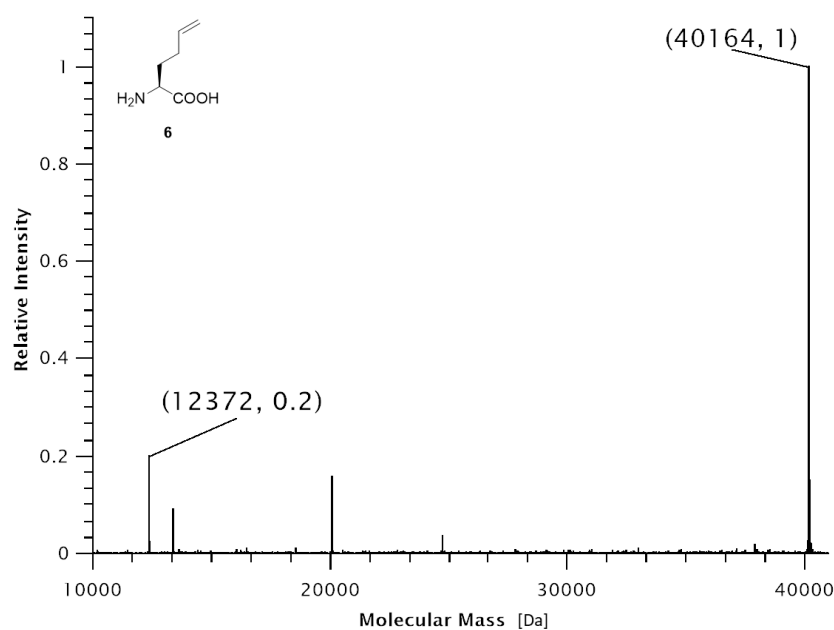

**Supplementary Figure S22:** Deconvoluted ESI-MS spectrum of His<sub>6</sub>-SUMO-sfGFP(R2(ncAA))-Strep production in *E. coli* BL21(DE3) with co-expression of SmbP-MbSacRS(N311M:C313W:V366K). Expected protein mass: 40162.8 Da. Observed mass: 40164 Da. Expected mass of His<sub>6</sub>-SUMO truncation product: 12372.8 Da. Observed mass: 12372 Da.

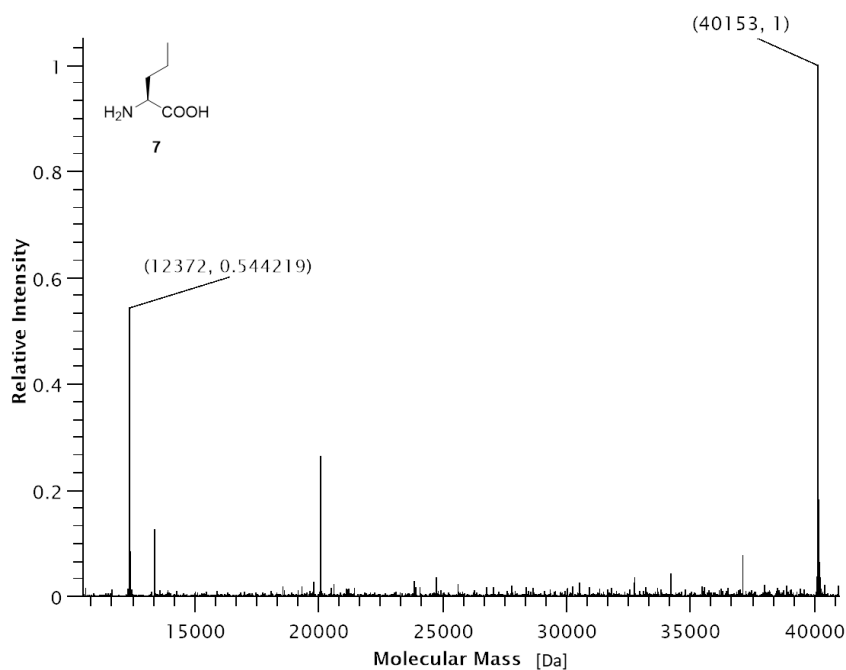

**Supplementary Figure S23:** Deconvoluted ESI-MS spectrum of His<sub>6</sub>-SUMO-sfGFP(R2(ncAA))-Strep production in *E. coli* BL21(DE3) with co-expression of SmbP-MbSacRS(N311M:C313W). Expected protein mass: 40150.8 Da. Observed mass: 40153 Da. Expected mass of His<sub>6</sub>-SUMO truncation product: 12372.8 Da. Observed mass: 12372 Da.

Mass spectrum of compound **9**. The x-axis represents Molecular Mass [Da] (0 to 40,000) and the y-axis represents Relative Intensity (0 to 1). The base peak is at (40164, 1). A significant peak is observed at (12373, 0.3). The chemical structure of **9** is shown as an inset: a cyclopropyl group attached to a chiral center, which is also bonded to an amino group (H<sub>2</sub>N) and a carboxylic acid group (COOH).

**Supplementary Figure S25:** Deconvoluted ESI-MS spectrum of His<sub>6</sub>-SUMO-sfGFP(R2(ncAA))-Strep production in *E. coli* BL21(DE3) with co-expression of SmbP-*Mb*SacRS(N311M:C313W). Expected protein mass: 40162.8 Da. Observed mass: 40164 Da. Expected mass of His<sub>6</sub>-SUMO truncation product: 12372.8 Da. Observed mass: 12373 Da.

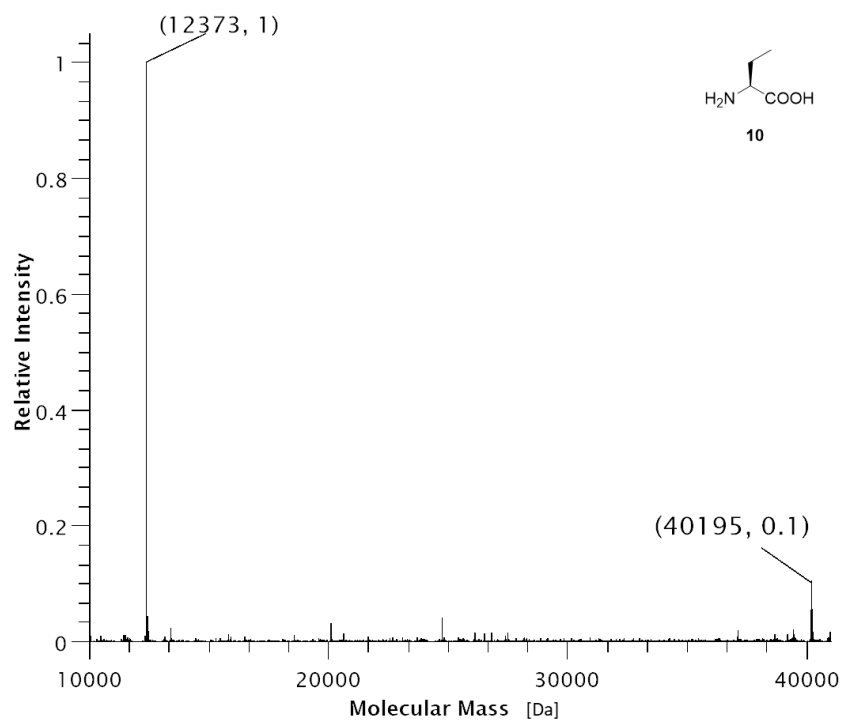

**Supplementary Figure S26:** Deconvoluted ESI-MS spectrum of His<sub>6</sub>-SUMO-sfGFP(R2(ncAA))-Strep production in *E. coli* BL21(DE3) with co-expression of SmbP-MbSacRS(N311M:C313W:V366A). Expected protein mass: 40136.8 Da. Observed mass: 40195 Da. Expected mass of His<sub>6</sub>-SUMO truncation product: 12372.8 Da. Observed mass: 12373 Da.

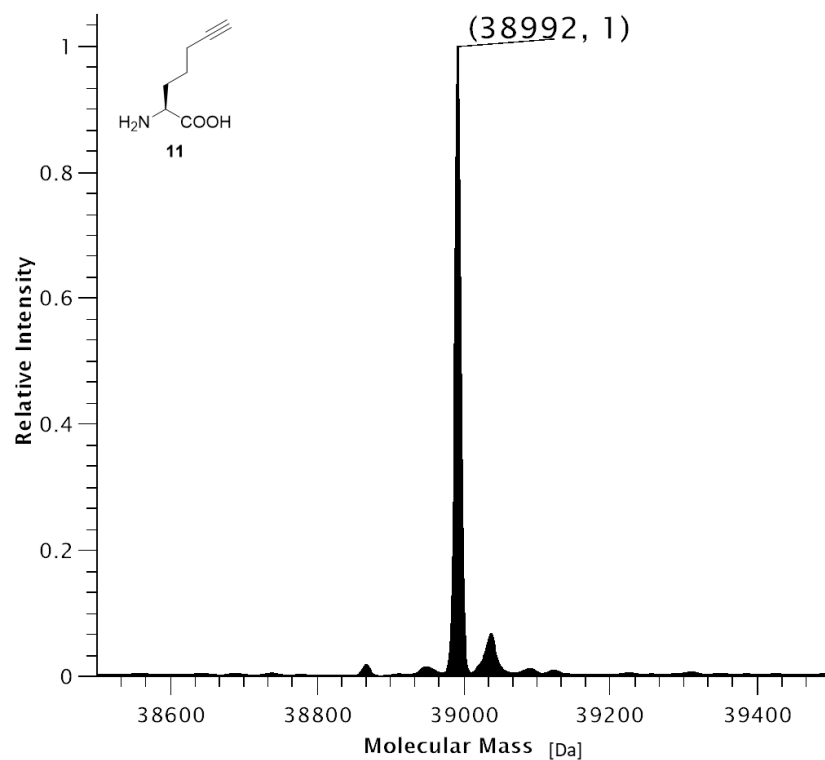

**Supplementary Figure S27:** Deconvoluted ESI-MS spectrum of SUMO-sfGFP(R2(ncAA))-His<sub>6</sub> production in *E. coli* C321.ΔA.exp(DE3) with co-expression of SmbP-MbSacRS(N311M:C313W). Expected protein mass: 38990.9 Da. Observed mass: 38992 Da.



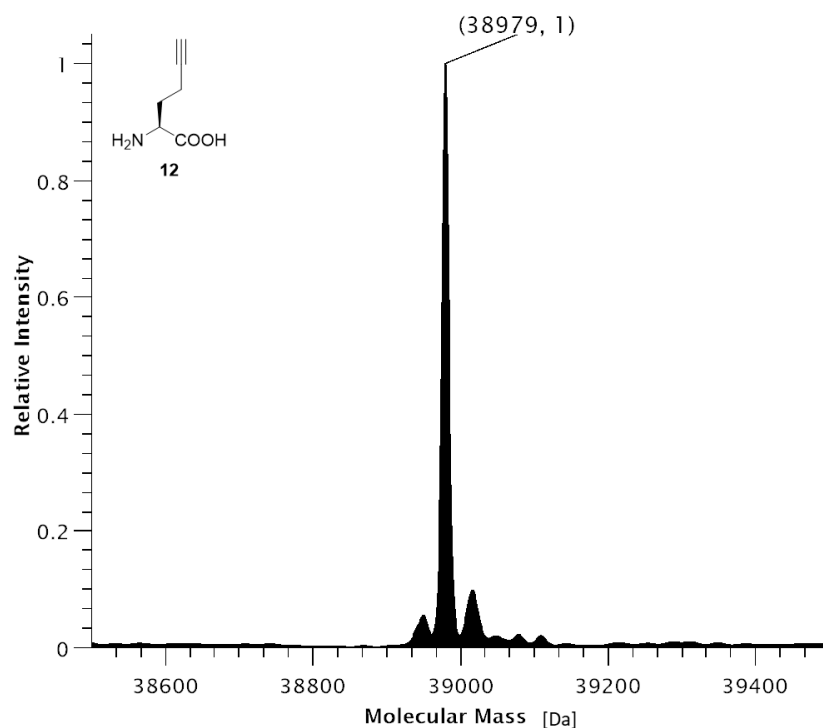

**Supplementary Figure S28:** Deconvoluted ESI-MS spectrum of SUMO-sfGFP(R2(ncAA))-His<sub>6</sub> production in *E. coli* C321.ΔA.exp(DE3) with co-expression of SmbP-MbSacRS(N311M:C313W). Expected protein mass: 38976.9 Da. Observed mass: 38979 Da.

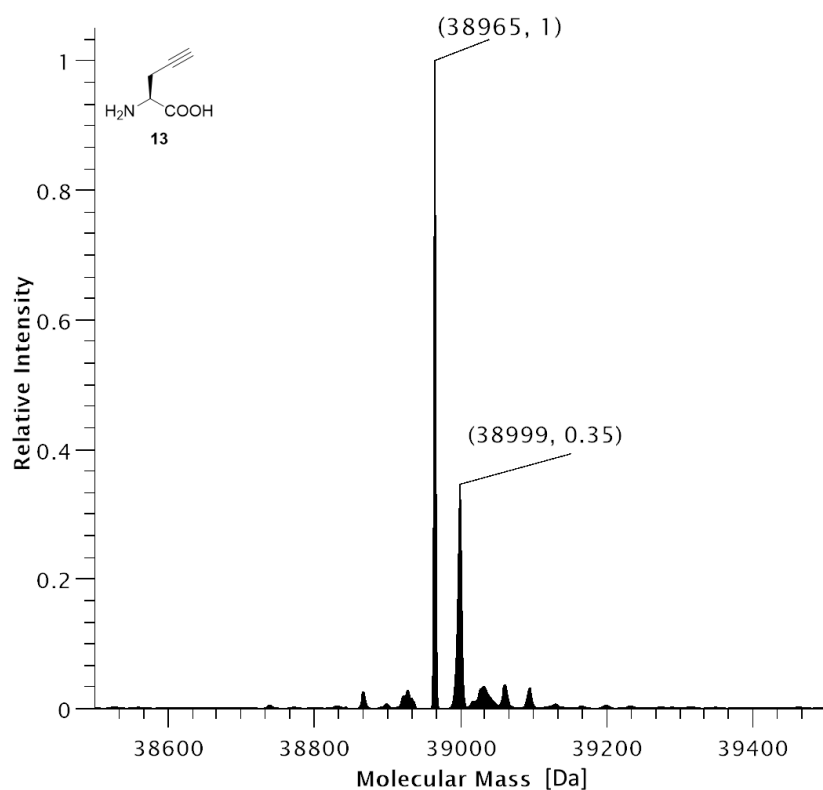

**Supplementary Figure S29:** Deconvoluted ESI-MS spectrum of SUMO-sfGFP(R2(ncAA))-His<sub>6</sub> production in *E. coli* C321.ΔA.exp(DE3) with co-expression of SmbP-MbSacRS(N311M:C313W). Expected protein mass: 38962.8 Da. Observed mass: 38965 Da.

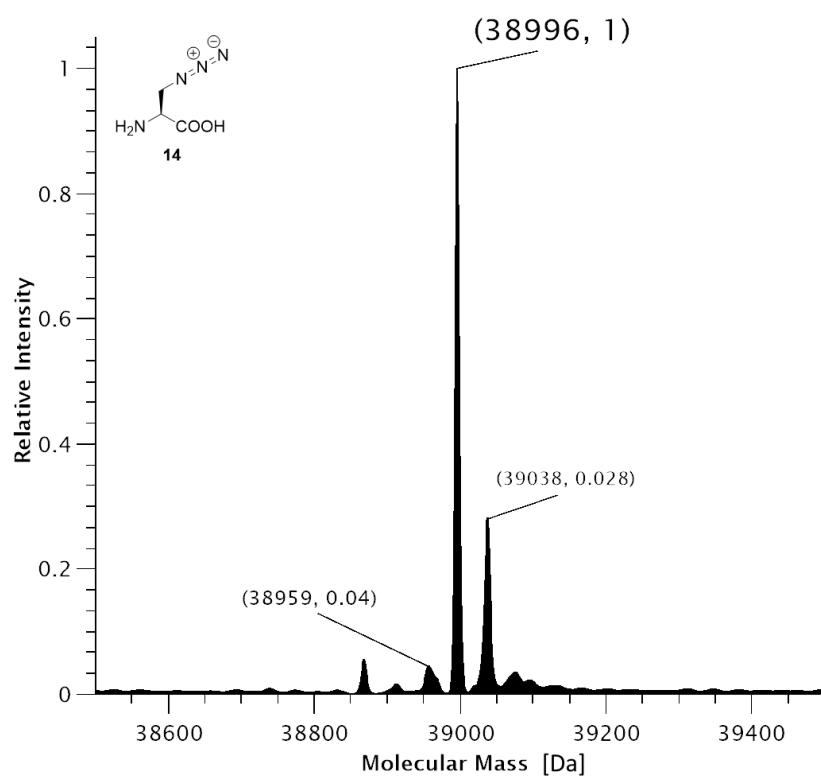

**Supplementary Figure S30:** Deconvoluted ESI-MS spectrum of SUMO-sfGFP(R2(ncAA))-His<sub>6</sub> production in *E. coli* JX33(DE3) with co-expression of SmbP-MbSacRS(N311M:C313W). Expected protein mass: 38979.8 Da. Observed mass: 38996 Da.

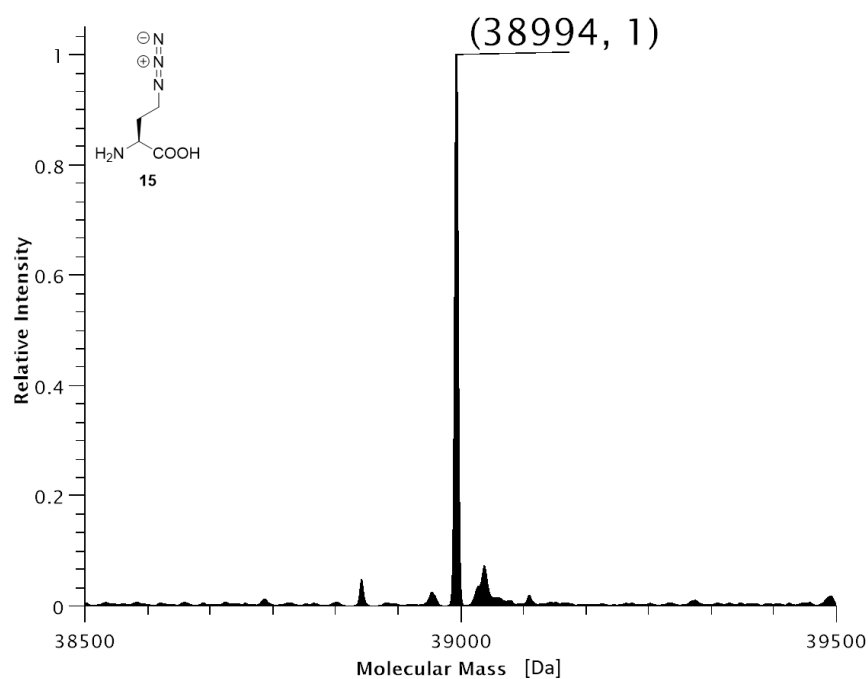

**Supplementary Figure S31:** Deconvoluted ESI-MS spectrum of SUMO-sfGFP(R2(ncAA))-His<sub>6</sub> production in *E. coli* C321.ΔA.exp(DE3) with co-expression of SmbP-MbSacRS(N311M:C313W). Expected protein mass: 38993.8 Da. Observed mass: 38994 Da.

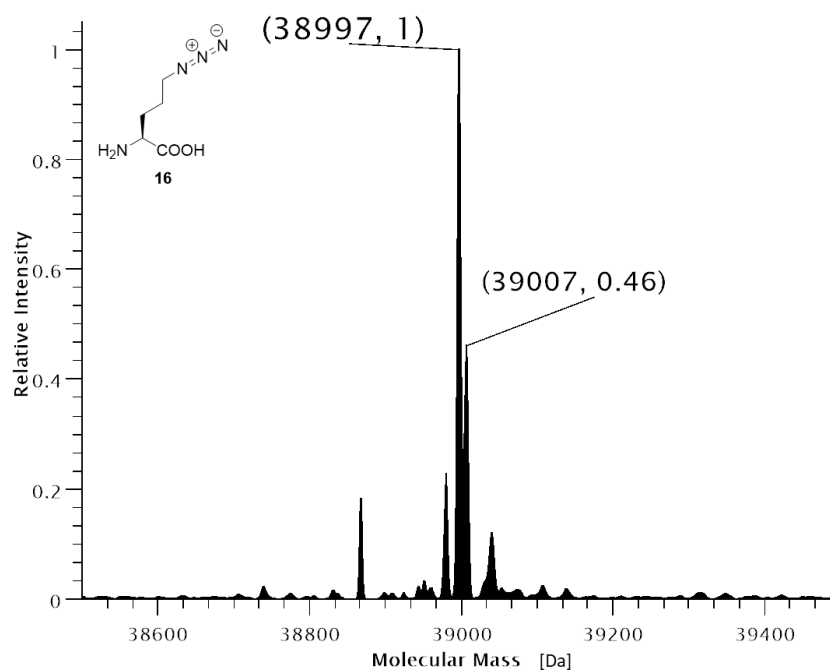

**Supplementary Figure S32:** Deconvoluted ESI-MS spectrum of SUMO-sfGFP(R2(ncAA))-His<sub>6</sub> production in *E. coli* C321.ΔA.exp(DE3) with co-expression of SmbP-MbSacRS(N311M:C313W). Expected protein mass: 39007.9 Da. Observed mass: 39007 Da.

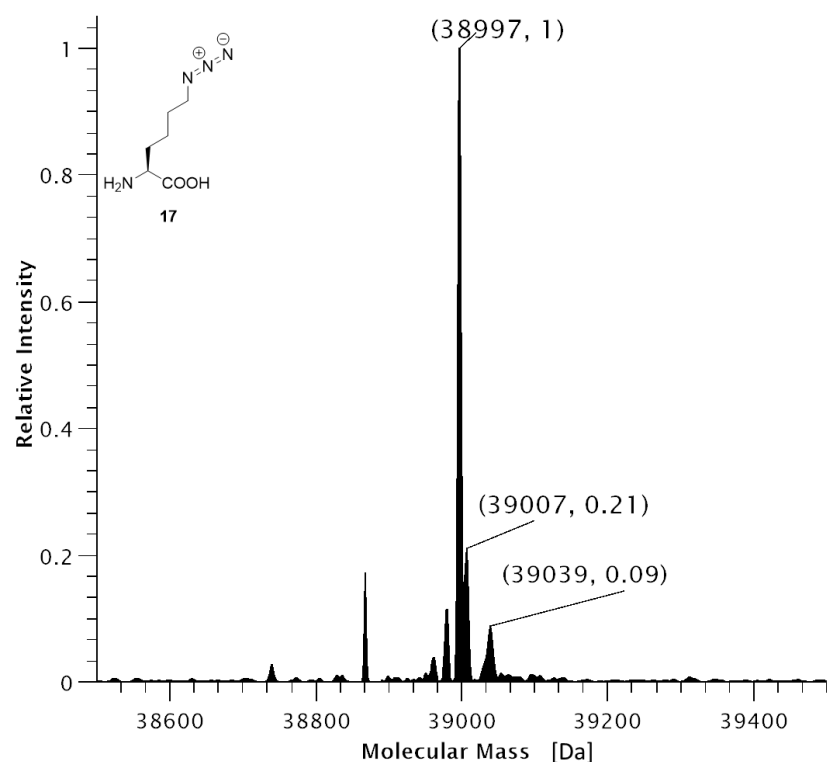

**Supplementary Figure S33:** Deconvoluted ESI-MS spectrum of SUMO-sfGFP(R2(ncAA))-His<sub>6</sub> production in *E. coli* C321.ΔA.exp(DE3) with co-expression of SmbP-MbSacRS(N311M:C313W). Expected protein mass: 39021.9 Da. Observed mass: 38997 Da.

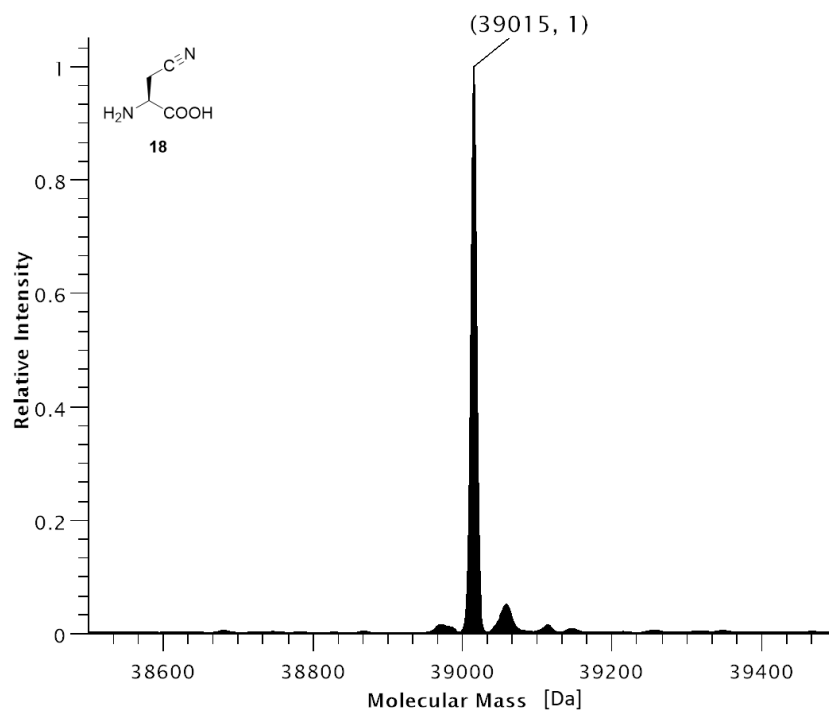

**Supplementary Figure S34:** Deconvoluted ESI-MS spectrum of SUMO-sfGFP(R2(ncAA))-His<sub>6</sub> production in *E. coli* C321.ΔA.exp(DE3) with co-expression of SmbP-MbSacRS(N311Q:C313W:V366K). Expected protein mass: 38963.8 Da. Observed mass: 39015 Da.

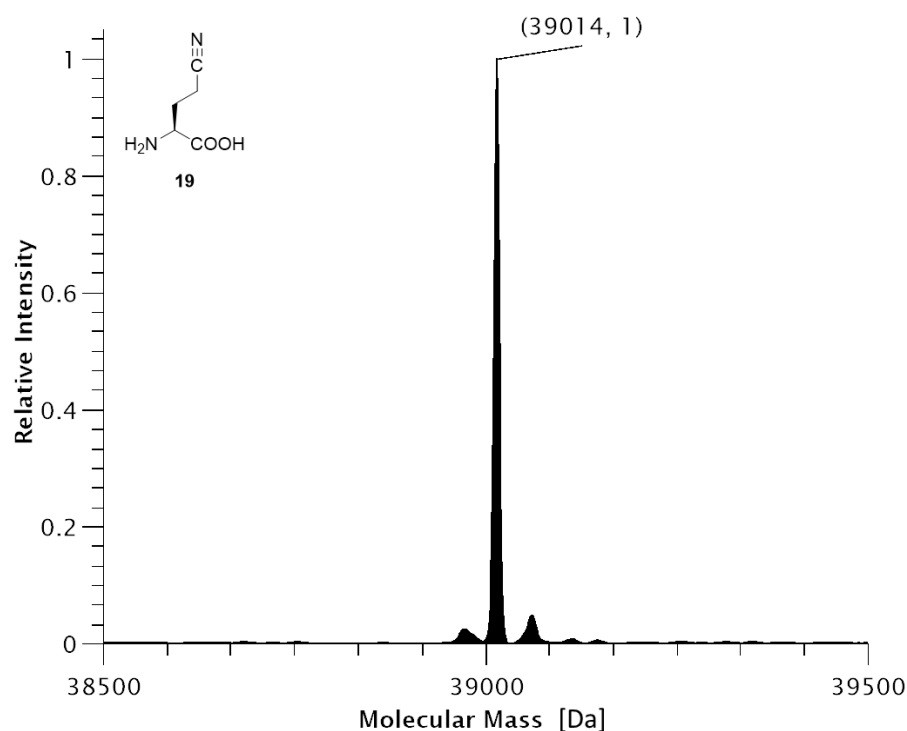

**Supplementary Figure S35:** Deconvoluted ESI-MS spectrum of SUMO-sfGFP(R2(ncAA))-His<sub>6</sub> production in *E. coli* C321.ΔA.exp(DE3) with co-expression of SmbP-MbSacRS(N311Q:C313W:V366K). Expected protein mass: 38977.8 Da. Observed mass: 39014 Da.

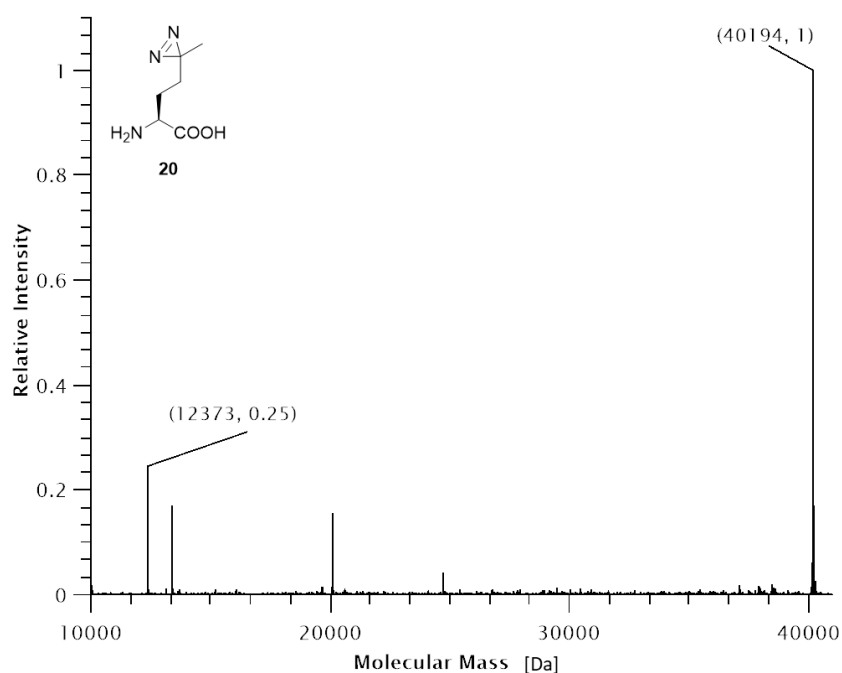

**Supplementary Figure S36:** Deconvoluted ESI-MS spectrum of His<sub>6</sub>-SUMO-sfGFP(R2(ncAA))-Strep production in *E. coli* BL21(DE3) with co-expression of SmbP-MbSacRS(N311M:C313W:V366A). Expected protein mass: 40190.8 Da. Observed mass: 40194 Da. Expected mass of His<sub>6</sub>-SUMO truncation product: 12372.8 Da. Observed mass: 12373 Da.

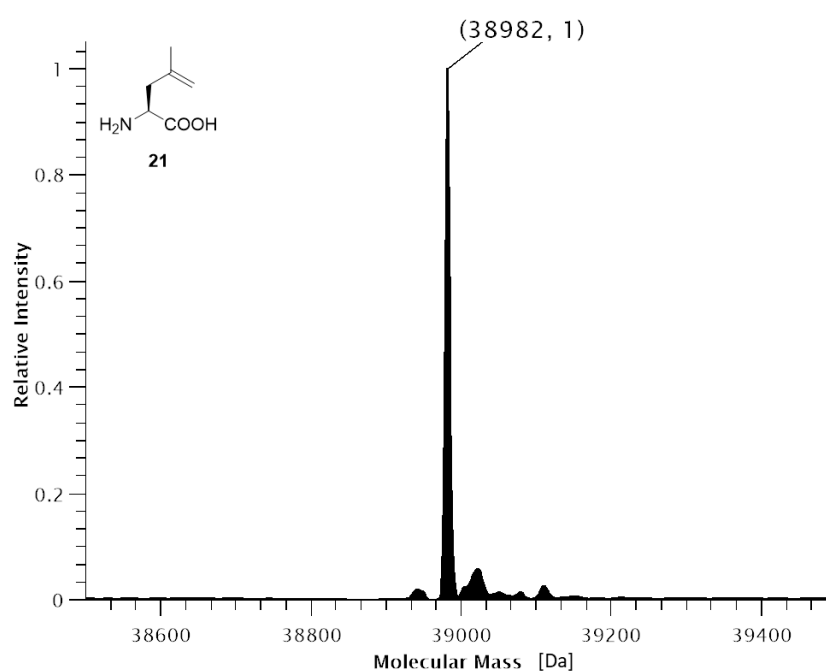

**Supplementary Figure S37:** Deconvoluted ESI-MS spectrum of SUMO-sfGFP(R2(ncAA))-His<sub>6</sub> production in *E. coli* BL21(DE3) with co-expression of SmbP-MbSacRS(N311M:C313W). Expected protein mass: 38978.9 Da. Observed mass: 38982 Da.

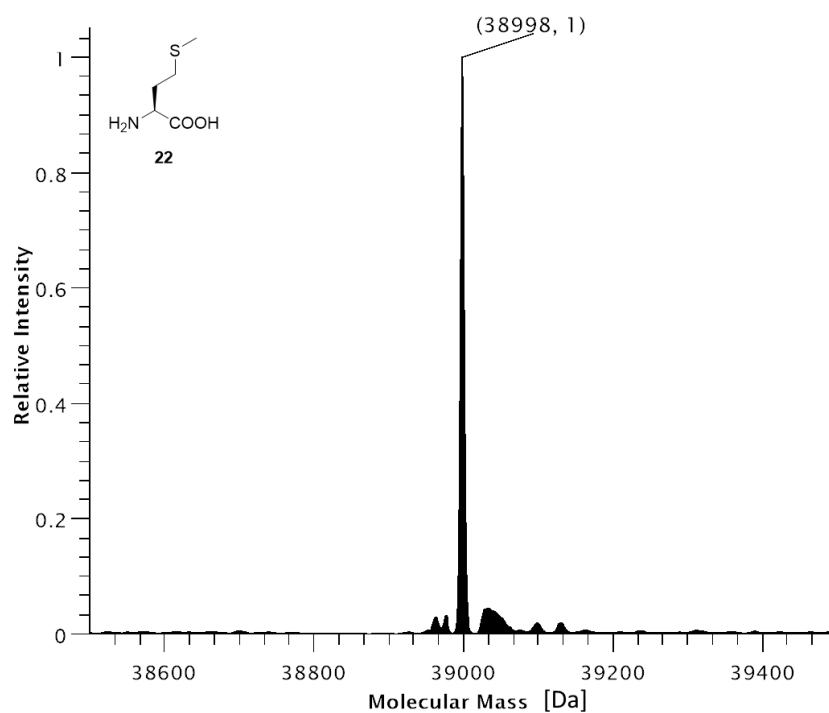

**Supplementary Figure S38:** Deconvoluted ESI-MS spectrum of SUMO-sfGFP(R2(AA))-His<sub>6</sub> production in *E. coli* BL21(DE3) with co-expression of SmbP-MbSacRS(N311M:C313W). Expected protein mass: 38998.9 Da. Observed mass: 38998 Da.

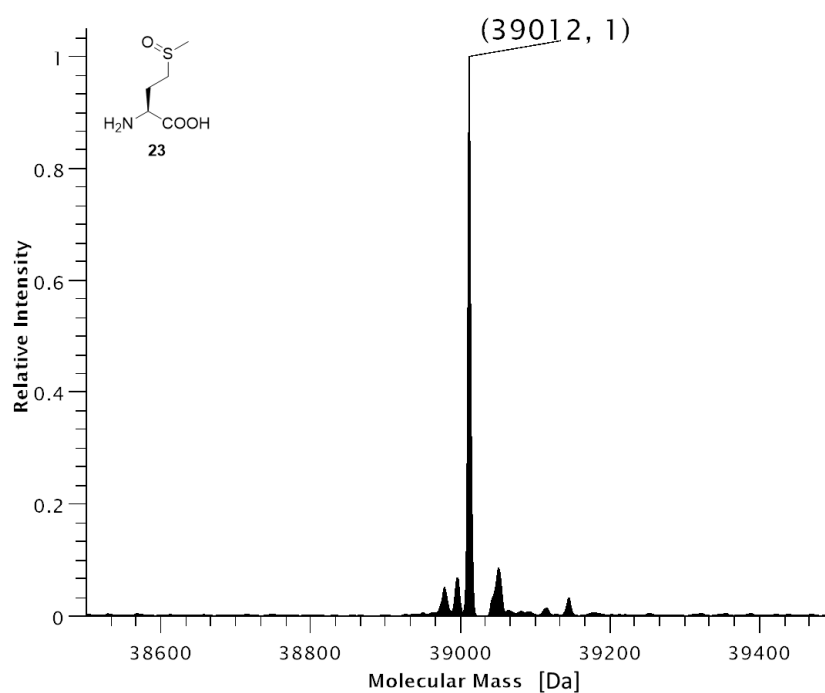

**Supplementary Figure S39:** Deconvoluted ESI-MS spectrum of SUMO-sfGFP(R2(ncAA))-His<sub>6</sub> production in *E. coli* BL21(DE3) with co-expression of SmbP-MbSacRS(N311Q:C313W). Expected protein mass: 39014.9 Da. Observed mass: 39012 Da.

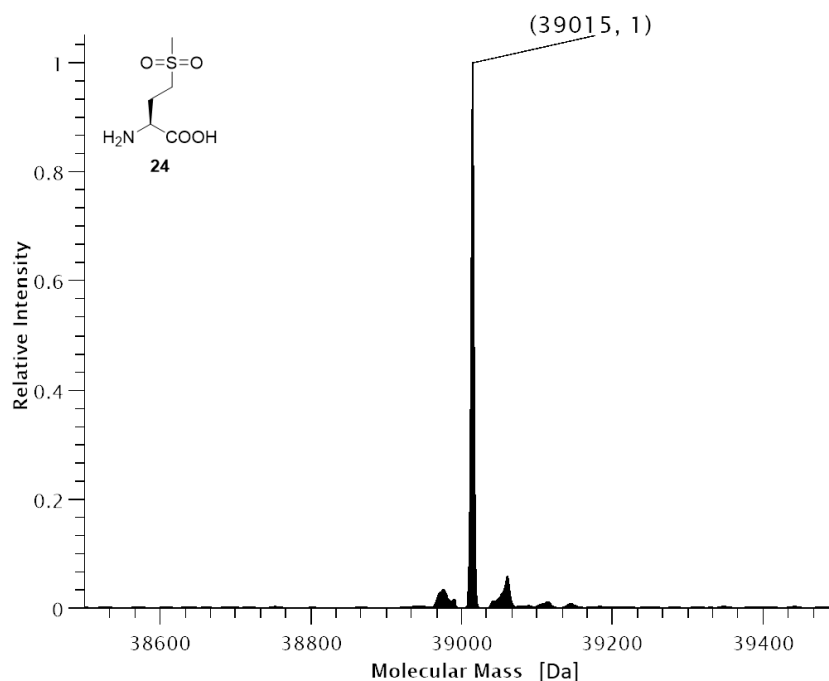

**Supplementary Figure S40:** Deconvoluted ESI-MS spectrum of SUMO-sfGFP(R2(ncAA))-His<sub>6</sub> production in *E. coli* BL21(DE3) with co-expression of SmbP-MbSacRS(N311M:C313W:V366K). Expected protein mass: 39030.9 Da. Observed mass: 39015 Da.

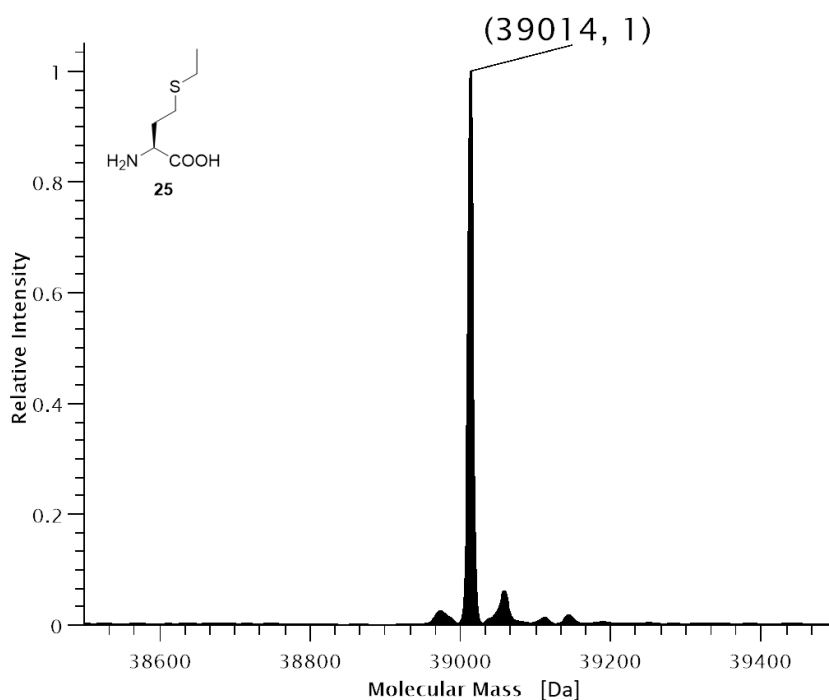

**Supplementary Figure S41:** Deconvoluted ESI-MS spectrum of SUMO-sfGFP(R2(ncAA))-His<sub>6</sub> production in *E. coli* BL21(DE3) with co-expression of SmbP-MbSacRS(N311Q:C313W). Expected protein mass: 39013 Da. Observed mass: 39014 Da.

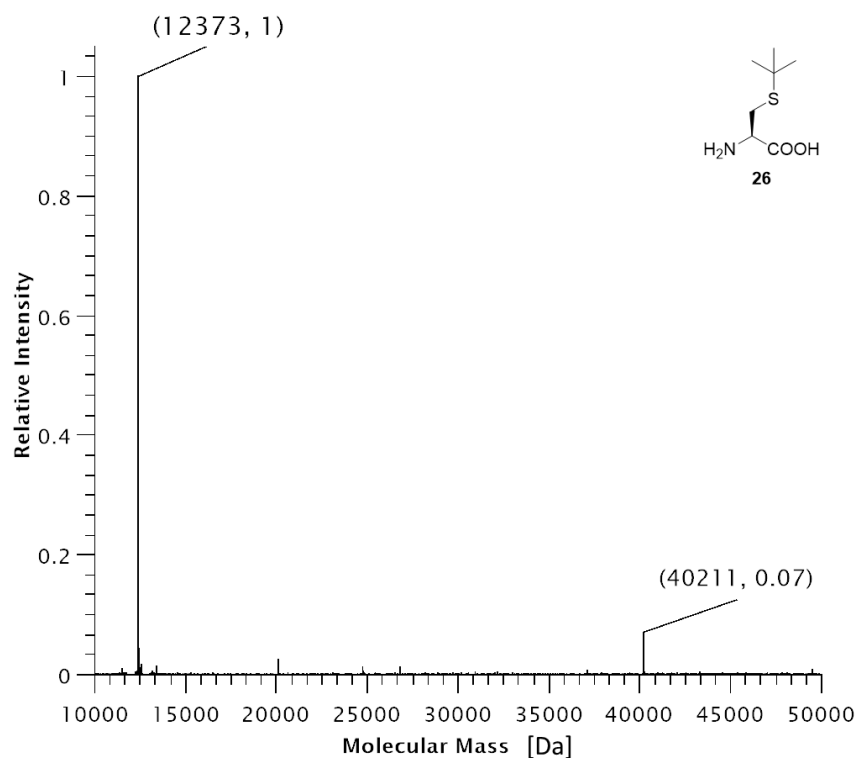

**Supplementary Figure S42:** Deconvoluted ESI-MS spectrum of His<sub>6</sub>-SUMO-sfGFP(R2(ncAA))-Strep production in *E. coli* BL21(DE3) with co-expression of SmbP-MbSacRS(N311M:C313W:V366A). Expected protein mass: 40190.8 Da. Observed mass: 40194 Da. Expected mass of His<sub>6</sub>-SUMO truncation product: 12372.8 Da. Observed mass: 12373 Da.

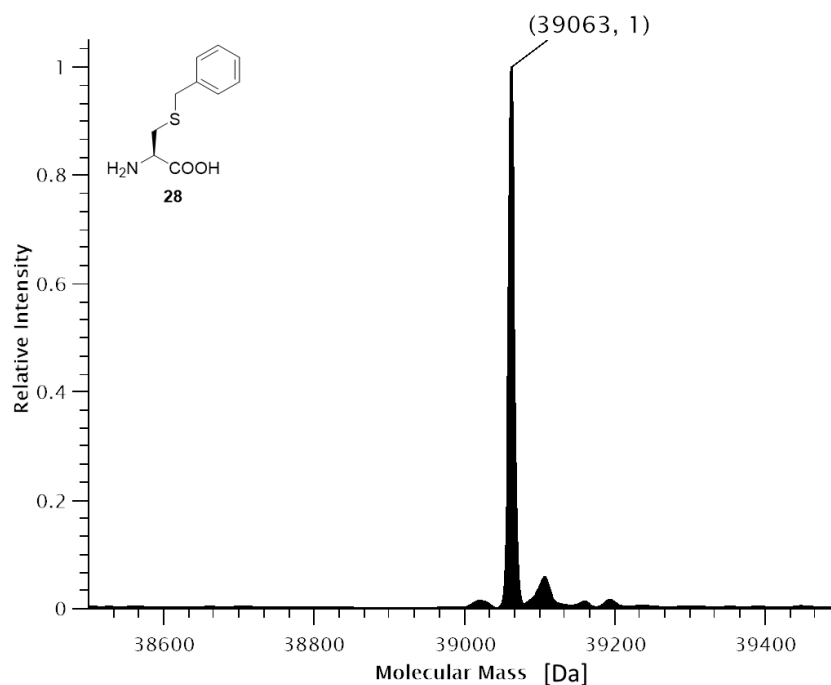

**Supplementary Figure S43:** Deconvoluted ESI-MS spectrum of SUMO-sfGFP(R2(ncAA))-His<sub>6</sub> production in *E. coli* BL21(DE3) with co-expression of SmbP-MbSacRS(N311M:C313W:V366A:W382N). Expected protein mass: 39061 Da. Observed mass: 39063 Da.



## 2.4. DNA sequences used in this study

The following section contains DNA sequences used in this study. For clarity, important regions of constructs are highlighted by color.

### 1) SmbP-(GSH-linker)-MbPyIRS(T13I:I36V:N311:C313:Y349F:V366:W382:)

ATGAGCGGTCATACCGCACATGTTGATGAAGCAGTTAAACATGCCGAAGAAGCAGTT  
GCACACGGTAAAGAAGGCCATACCGATCAGCTGCTGGAACATGCAAAAGAAAGTCTGACC  
CATGCCAAAGCAGCCAGCGAAGCCGGTGGTAATACCCATGTTGGTCATGGTATTAAACATC  
TGGAAGATGCCATCAAACATGGTGAAGAGGGTCATGTTGGTGTGCGACCAAACACGCAC  
AAGAAGCAATTGAACATCTGCGTGCAAGCGAACATAAAAGCCATGCGCGCTCTCATATGG  
ACAAAAAACCGCTGGACGTTCTGATTAGCGCAATTGGTCTGTGGATGAGCCGTACCGGCAC  
CCTGCATAAAATCAAACATCATGAAGTTAGCCGCAGCAAAGTCTATATTGAAATGGCATGT  
GGTGATCATCTGGTGGTGAATAATAGCCGTAGCTGTCGTACCGCACGTGCATTTTCGTCATCA  
CAAATATCGTAAAACCTGTAAACGTTGCCGTGTAGCGACGAAGATATTAACAATTTTCTG  
ACCCGTAGCACCGAAAGCAAAAATTCAGTTAAAGTTCGTGTTGTGAGCGCTCCGAAAGTTA  
AAAAAGCAATGCCGAAAAGCGTTAGTCGTGCACCGAAACCTCTGGAAAATAGCGTTAGCG  
CAAAAGCAAGCACCAATACCAGCCGTAGCGTTCGAGTCCGGCAAAAAGCACCCCGAATA  
GCAGCGTTCGCGCAAGCGCACCGGCACCGAGCCTGACCCGTTACAGCTGGATCGTGTTGA  
AGCACTGCTGAGCCCTGAAGATAAAATCAGCCTGAATATGGCAAAACCGTTTTCGTGAACCTG  
GAACCGGAACCTGGTTACCCGTCGTAAAAATGATTTTCAGCGTCTGTATACCAACGATCGCG  
AAGATTATCTGGGTAAACTGGAACGTGATATTACCAAATTTTTCGTGGATCGCGGTTTTCTG  
GAAATCAAAAGCCCGATTCTGATTCCGGCAGAATATGTTGAACGTATGGGCATTAATAACG  
ATACCGAACTGAGCAAACAAATCTTCCGCGTTGATAAAAATCTGTGCTGCGTCCGATGCT  
GGCACCGACCCTGTATAACTATCTGCGCAAACCTGGATCGTATTCTGCCTGGTCCGATTAAA  
ATCTTTGAAGTTGGTCCGTGCTATCGCAAAGAAAGTGATGGTAAAGAACACCTGGAAGAGT  
TTACGATGGTTAACTTTTGTTCAGATGGGTAGCGGTTGTACCCGTGAAAATCTGGAAGCACTG  
ATTAAAGAGTTTCTGGACTATCTGGAAATTGACTTTGAAATTGTTGGCGATAGCTGCATGGT  
TTTTGGTGATACCCTGGATATTATGCATGGTGATCTGGAACCTGAGTAGCGCAATTGTTGGTC  
CGGTTAGCCTGGATCGCGAATGGGGTATTGATAAACCGTGAATTGGTGCAGGTTTTGGTCTG  
GAACGTCTGCTGAAAGTTATGCACGGCTTTAAAAACATTAAACGTGCAAGCCGTTCCGAGA  
GCTATTACAATGGTATTAGCACCAACCTGTAA

### 2) His<sub>6</sub>-SUMO-sfGFP(R2amber)-strep

ATGGGCAGCAGCCATCATCATCATCACGGTTCTGACTCCGAAGTCAATCAAGAAG  
CTAAGCCAGAGGTCAAGCCAGAAGTCAAGCCTGAGACTCACATCAATTTAAAGGTGTCCG  
ATGGATCTTCAGAGATCTTCTTCAAGATCAAAAAGACCACTCCTCTGCGTCGTCTGATGGAA  
GCGTTCGCTAAAAGACAGGGTAAGGAAATGGACTCCTTAAGATTCTTGTACGACGGTATTA  
GAATCCAAGCTGATCAGACCCCTGAAGATTTGGACATGGAGGATAACGATATTATTGAGGC  
TCATCGCGAACAGATTGGTGGCATGTAGAAAGGCGAAGAGCTGTTCACTGGTGTCTGCCCT  
ATTCTGGTGGAACTGGATGGTGATGTCAACGGTCATAAGTTTTCCGTGCGTGGCGAGGGTG  
AAGGTGACGCAACTAATGGTAACTGACGCTGAAGTTCATCTGTACTACTGGTAAACTGCC  
GGTACCTTGGCCGACTCTGGTAACGACGCTGACTTATGGTGTTCAGTGCTTTGCTCGTTATCC  
GGACCATATGAAGCAGCATGACTTCTTCAAGTCCGCCATGCCGGAAGGCTATGTGCAGGAA  
CGCACGATTTCTTTAAGGATGACGGCACGTACAAAACGCGTGCGGAAGTGAAATTTGAA  
GGCGATACCCTGGTAAACCGCATTGAGCTGAAAGGCATTGACTTTAAAGAAGACGGCAAT  
ATCCTGGGCCATAAGCTGGAATACAATTTTAAACAGCCACAATGTTTACATACCGCCGATA  
AACAAAAAATGGCATTAAAGCGAATTTTAAATTCGCCACAACGTGGAGGATGGCAGCG  
TGCAGCTGGCTGATCACTACCAGCAAAACACTCCAATCGGTGATGGTCCTGTTCTGCTGCC  
AGACAATCACTATCTGAGCACGCAAAGCGTCTGTCTAAAGATCCGAACGAGAAACGCGA

TCATATGGTTCTGCTGGAGTTCGTAACCGCAGCGGGCATCACGCATGGTATGGATGAACTG  
TACAAAAGCGCTTGGAGCCACCCGCAGTTCGAAAAATAA

3) SUMO-sfGFP(R2<sup>amber</sup>)-His<sub>6</sub>

ATGGGCAGCAGCGACTCCGAAGTCAATCAAGAAGCTAAGCCAGAGGTCAAGCCAGA  
AGTCAAGCCTGAGACTCACATCAATTTAAAGGTGTCCGATGGATCTTCAGAGATCTTCTTCA  
AGATCAAAAAGACCACTCCTCTGCGTCGTCTGATGGAAGCGTTCGCTAAAAGACAGGGTA  
AGGAAATGGACTCCTTAAGATTCTTGTACGACGGTATTAGAATCCAAGCTGATCAGACCCC  
TGAAGATTTGGACATGGAGGATAACGATATTATTGAGGCTCATCGCGAACAGATTGGTGGC  
ATGTAGAAAAGGCGAAGAGCTGTTCACTGGTGTCTGCCCTATTCTGGTGGAAGTGGATGGTG  
ATGTCAACGGTCATAAGTTTTCCGTGCGTGCGGAGGGTGAAGGTGACGCAACTAATGGTAA  
ACTGACGCTGAAGTTCATCTGTACTACTGGTAAACTGCCGGTACCTTGGCCGACTCTGGTAA  
CGACGCTGACTTATGGTGTTCAAGTGTCTTTGCTCGTTATCCGGACCATATGAAGCAGCATGAC  
TTCTTCAAGTCCGCCATGCCGGAAGGCTATGTGCAGGAACGCACGATTTCTTTAAGGATG  
ACGGCACGTACAAAACGCGTGCGGAAGTGAAATTTGAAGGCGATACCCTGGTAAACCGCA  
TTGAGCTGAAAGGCATTGACTTTAAAGAAGACGGCAATATCCTGGGCCATAAGCTGGAATA  
CAATTTTAAACAGCCACAATGTTTACATCACCGCCGATAAACAACAAAAAATGGCATTAAAGC  
GAATTTTAAAATTCGCCACAACGTGGAGGATGGCAGCGTGCAGCTGGCTGATCACTACCAG  
CAAAACACTCCAATCGGTGATGGTCCTGTTCTGCTGCCAGACAATCACTATCTGAGCACGC  
AAAGCGTTCTGTCTAAAGATCCGAACGAGAAACGCGATCATATGGTTCTGCTGGAGTTCGT  
AACCGCAGCGGGCATCACGCATGGTATGGATGAACTGTACAAAAGCGCTCATCATCATCAT  
CATCACTAA

## References:

31. Owens, A.E.; Grasso, K.T.; Ziegler, C.A.; Fasan, R. Two-Tier Screening Platform for Directed Evolution of Aminoacyl-tRNA Synthetases with Enhanced Stop Codon Suppression Efficiency. *ChemBioChem* **2017**, *18*, 1109–1116, doi:10.1002/cbic.201700039.
